# Supplementary material for: Research on the distribution ratio of variants and the proportion of variant types in different conditions of SCN1A Seizure Disorders using ClinVar
Source: Research Square preprint supplement (doi:10.21203/rs.3.rs-1664068/v1), 2022-05-31
Supplement: Supplementary file 1 [file bef4dee5f6523f039fcf874b.xlsx]

## Sheet: Sheet1
Supplementary Table 5 Raw data for 26 SCN1A variants validated by case reports associated with Other conditions
Name	Condition(s)	Condition of case report	Case report	Clinical significance (Last reviewed)	GRCh37Chromosome	GRCh37Location	GRCh38Chromosome	GRCh38Location
NM_001165963.4(SCN1A):c.5222G>C (p.Cys1741Ser)	Early infantile epileptic encephalopathy with suppression bursts	Lennox-Gastaut Syndrome	PMID:23934111,29186148	Pathogenic(Last reviewed: May 11, 2018)	2	166848563	2	165992053
NM_001165963.4(SCN1A):c.4040T>C (p.Ile1347Thr)	Early infantile epileptic encephalopathy with suppression bursts	SCN1A-related epilepsy	PMID:27652284	Likely pathogenic(Last reviewed: Jul 1, 2019)	2	166859226	2	166002716
NM_001165963.4(SCN1A):c.4016C>A (p.Ala1339Asp)	not provided|Early infantile epileptic encephalopathy with suppression bursts	early infantile epileptic encephalopathy	PMID:29655203	Pathogenic(Last reviewed: Jun 13, 2019)	2	166859250	2	166002740
NM_001165963.4(SCN1A):c.1144G>A (p.Asp382Asn)	Early infantile epileptic encephalopathy with suppression bursts	epilepsy	PMID:21248271	Likely pathogenic(Last reviewed: Dec 5, 2019)	2	166904163	2	166047653
NM_001165963.4(SCN1A):c.338C>T (p.Pro113Leu)	Early infantile epileptic encephalopathy with suppression bursts	early onset epileptic encephalopathy	PMID:29655203	Pathogenic(Last reviewed: Dec 2, 2019)	2	166915125	2	166058615
NM_001165963.4(SCN1A):c.3429+1G>A	Early infantile epileptic encephalopathy with suppression bursts	SCN1A-related conditions	PMID:21248271	Pathogenic(Last reviewed: Jun 6, 2020)	2	166892557	2	166036047
NM_001165963.4(SCN1A):c.1525C>T (p.Gln509Ter)	Early infantile epileptic encephalopathy with suppression bursts	early onset severe epilepsy	PMID:29720203	Pathogenic(Last reviewed: Mar 17, 2020)	2	166901690	2	166045180
NM_001165963.4(SCN1A):c.5318C>T (p.Ser1773Phe)	Early infantile epileptic encephalopathy with suppression bursts|Severe myoclonic epilepsy in infancy	epileptic encephalopathy	PMID:29100083	Likely pathogenic(Last reviewed: May 18, 2018)	2	166848467	2	165991957
NM_001165963.4(SCN1A):c.5006C>A (p.Ala1669Glu)	Early infantile epileptic encephalopathy with suppression bursts|Severe myoclonic epilepsy in infancy	malignant migrating partial seizures of infancy	PMID:21555645	Likely pathogenic(Last reviewed: Apr 10, 2020)	2	166848779	2	165992269
NM_001165963.4(SCN1A):c.4762T>C (p.Cys1588Arg)	Early infantile epileptic encephalopathy with suppression bursts|not provided|Severe myoclonic epilepsy in infancy	epileptic encephalopathies	PMID:17561957,25818041	Pathogenic/Likely pathogenic(Last reviewed: Mar 6, 2018)	2	166850746	2	165994236
NM_001165963.4(SCN1A):c.4428C>A (p.Asn1476Lys)	Early infantile epileptic encephalopathy with suppression bursts|Severe myoclonic epilepsy in infancy	SCN1A-related disease	PMID:21248271	Pathogenic/Likely pathogenic(Last reviewed: May 28, 2019)	2	166854596	2	165998086
NM_001165963.4(SCN1A):c.2963T>G (p.Leu988Arg)	Severe myoclonic epilepsy in infancy	Seizures	PMID:31102827	Likely pathogenic(Last reviewed: May 10, 2019)	2	166893024	2	166036514
NM_001165963.4(SCN1A):c.2935G>A (p.Gly979Arg)	not provided|Severe myoclonic epilepsy in infancy	intractable childhood epilepsy with generlaized tonic-clonic seizures (ICEGTC)	PMID:12566275	Pathogenic(Last reviewed: Dec 1, 2021)	2	166894297	2	166037787
NM_001165963.4(SCN1A):c.2584C>G (p.Arg862Gly)	Severe myoclonic epilepsy in infancy	migrating partial seizures of infancy	PMID:21753172	Pathogenic(Last reviewed: Jul 26, 2011)	2	166895938	2	166039428
NM_001165963.4(SCN1A):c.1028G>A (p.Gly343Asp)	Early infantile epileptic encephalopathy with suppression bursts|Severe myoclonic epilepsy in infancy	SCN1A-related conditions	PMID:12566275	Pathogenic(Last reviewed: Sep 20, 2020)	2	166905396	2	166048886
NM_001165963.4(SCN1A):c.493T>C (p.Tyr165His)	Severe myoclonic epilepsy in infancy|Early infantile epileptic encephalopathy with suppression bursts	SCN1A-related conditions	PMID:31780880	Pathogenic/Likely pathogenic(Last reviewed: Sep 23, 2021)	2	166911257	2	166054747
NM_001165963.4(SCN1A):c.3977C>A (p.Ala1326Asp)	Neurodevelopmental disorder|Early infantile epileptic encephalopathy with suppression bursts	Dravet syndrome without myoclonic seizures and ataxia	PMID:19763161	Pathogenic/Likely pathogenic(Last reviewed: Aug 27, 2020)	2	166866254	2	166009744
NM_001165963.4(SCN1A):c.4831G>T (p.Val1611Phe)	Generalized epilepsy with febrile seizures plus, type 2|Severe myoclonic epilepsy in infancy	intractable childhood epilepsy with generalized tonic-clonic seizures	PMID:12566275	Pathogenic(Last reviewed: Mar 1, 2003)	2	166850677	2	165994167
NM_001165963.4(SCN1A):c.4970G>A (p.Arg1657His)	Autistic disorder|Microcephaly|Focal-onset seizure|Early infantile epileptic encephalopathy with suppression bursts|Focal epilepsy	onset epilepsy	PMID:17347258	Likely pathogenic(Last reviewed: Nov 11, 2019)	2	166848815	2	165992305
NM_001165963.4(SCN1A):c.4495T>C (p.Phe1499Leu)	Familial hemiplegic migraine type 3|Early infantile epileptic encephalopathy with suppression bursts|not provided	Familial hemiplegic migraine	PMID:19332696	Likely pathogenic(Last reviewed: Sep 1, 2021)	2	166852609	2	165996099
NM_001165963.4(SCN1A):c.3851G>A (p.Trp1284Ter)	Early infantile epileptic encephalopathy with suppression bursts|Primary generalized epilepsy	Developmental delay with seizures	PMID:26993267	Pathogenic(Last reviewed: Aug 19, 2021)	2	166868647	2	166012137
NM_001165963.4(SCN1A):c.4467G>C (p.Gln1489His)	Familial hemiplegic migraine type 3	Familial hemiplegic migraine	PMID:19332696	Likely pathogenic(Last reviewed: Mar 31, 2009)	2	166854557	2	165998047
NM_001165963.4(SCN1A):c.4465C>A (p.Gln1489Lys)	Familial hemiplegic migraine type 3	Familial hemiplegic migraine	PMID:16054936	Likely pathogenic(Last reviewed: Jul 30, 2005)	2	166854559	2	165998049
NM_001165963.4(SCN1A):c.1264G>T (p.Val422Leu)	Developmental and epileptic encephalopathy 6B	Developmental and epileptic encephalopathy 6B	PMID:24776920	Pathogenic(Last reviewed: May 17, 2021)	2	166903393	2	166046883
NM_001165963.4(SCN1A):c.4033C>T (p.Pro1345Ser)	Developmental and epileptic encephalopathy 6B|Early infantile epileptic encephalopathy with suppression bursts	Developmental and epileptic encephalopathy 6B	PMID:28794249,23708187	Likely pathogenic(Last reviewed: Dec 14, 2018)	2	166859233	2	166002723
NM_001165963.4(SCN1A):c.677C>T (p.Thr226Met)	Early infantile epileptic encephalopathy with suppression bursts|not provided|Severe myoclonic epilepsy in infancy|Developmental and epileptic encephalopathy 6B|Severe myoclonic epilepsy in infancy|Generalized epilepsy with febrile seizures plus, type 2|Familial hemiplegic migraine type 3|Global developmental delay|Seizure	Developmental and epileptic encephalopathy 6B	PMID:28794249,17347258,23895530,25401298	Pathogenic(Last reviewed: Jan 19, 2022)	2	166909379	2	166052869
