# Supplementary material for: Research on the distribution ratio of variants and the proportion of variant types in different conditions of SCN1A Seizure Disorders using ClinVar
Source: Research Square preprint supplement (doi:10.21203/rs.3.rs-1664068/v1), 2022-05-31
Supplement: Supplementary file 2 [file dfa9065a1ea9233d4243f78e.xlsx]

## Sheet: Sheet1
Supplementary Table 4 Raw data for 35 SCN1A variants validated by case reports associated with MIX
Name	Condition(s)	Condition of case report	Case report	Clinical significance (Last reviewed)	GRCh37Chromosome	GRCh37Location	GRCh38Chromosome	GRCh38Location
NM_001165963.4(SCN1A):c.5444T>C (p.Phe1815Ser)	Early infantile epileptic encephalopathy with suppression bursts	GTCS,TS,MS,febrile seizure	PMID:31009440	Pathogenic(Last reviewed: Sep 17, 2020)	2	166848341	2	165991831
NM_001165963.4(SCN1A):c.5293T>C (p.Phe1765Leu)	Early infantile epileptic encephalopathy with suppression bursts	Partial epilepsy with antecedent febrile seizures and seizure aggravation by antiepileptic drugs	PMID:20550552	Likely pathogenic(Last reviewed: Jul 11, 2019)	2	166848492	2	165991982
NM_001165963.4(SCN1A):c.4555C>T (p.Pro1519Ser)	Early infantile epileptic encephalopathy with suppression bursts	Dravet syndrome or childhood onset seizures	PMID:30868114,29778030	Likely pathogenic(Last reviewed: May 25, 2020)	2	166852549	2	165996039
NM_001165963.4(SCN1A):c.2819C>T (p.Ser940Phe)	not provided|Early infantile epileptic encephalopathy with suppression bursts	Dravet syndrome and intractable childhood epilepsy	PMID:Â¬â€ 23195492, 23884151	Pathogenic/Likely pathogenic(Last reviewed: Sep 26, 2018)	2	166894413	2	166037903
NM_001165963.4(SCN1A):c.2802G>A (p.Met934Ile)	Early infantile epileptic encephalopathy with suppression bursts	borderline severe myoclonic epilepsy in infancy (SMEB) and intractable childhood epilepsy	PMID: 14738421,23195492	Pathogenic(Last reviewed: Oct 3, 2018)	2	166894430	2	166037920
NM_001165963.4(SCN1A):c.1150T>A (p.Trp384Arg)	not provided|Early infantile epileptic encephalopathy with suppression bursts	Dravet Syndrome and vaccination induced seizures	PMID:23762420	Pathogenic(Last reviewed: Jun 17, 2019)	2	166904157	2	166047647
NM_001165963.4(SCN1A):c.4852+1G>T	Early infantile epileptic encephalopathy with suppression bursts	generalized epilepsy with febrile seizures plus (GEFS+) and/or Dravet syndrome	PMID:28202706,21248271	Pathogenic(Last reviewed: Feb 22, 2020)	2	166850655	2	165994145
NM_001165963.4(SCN1A):c.4693C>T (p.Gln1565Ter)	Early infantile epileptic encephalopathy with suppression bursts	epilepsy and/or a neurodevelopmental disorder	PMID:29655203	Pathogenic(Last reviewed: Dec 16, 2019)	2	166850815	2	165994305
NM_001165963.4(SCN1A):c.4581+1G>A	Early infantile epileptic encephalopathy with suppression bursts	Dravet syndrome and borderline severe myoclonic epilepsy of infancy	PMID:18930999,23195492	Pathogenic(Last reviewed: Sep 26, 2019)	2	166852522	2	165996012
NM_001165963.4(SCN1A):c.2855G>A (p.Trp952Ter)	Early infantile epileptic encephalopathy with suppression bursts	severe myoclonic epilepsy of infancy and intractable epilepsy	PMID:12566275,23195492	Pathogenic(Last reviewed: Feb 6, 2020)	2	166894377	2	166037867
NM_001165963.4(SCN1A):c.4384T>C (p.Tyr1462His)	History of neurodevelopmental disorder|Early infantile epileptic encephalopathy with suppression bursts	Dravet syndrome，borderline Dravet syndrome or intractable seizures	PMID:21248271	Pathogenic(Last reviewed: Aug 14, 2021)	2	166854640	2	165998130
NM_001165963.4(SCN1A):c.2831T>C (p.Val944Ala)	Severe myoclonic epilepsy in infancy|Early infantile epileptic encephalopathy with suppression bursts	Dravet syndrome and intractable epilepsy	PMID:14738421,23195492	Pathogenic(Last reviewed: Jan 28, 2020)	2	166894401	2	166037891
NM_001165963.4(SCN1A):c.985G>T (p.Gly329Cys)	Intellectual disability|Severe myoclonic epilepsy in infancy|not provided|Early infantile epileptic encephalopathy with suppression bursts	SCN1A-related conditions and/or Dravet syndrome	PMID:29655203,32538476	Pathogenic/Likely pathogenic(Last reviewed: Sep 21, 2021)	2	166905439	2	166048929
NM_001165963.4(SCN1A):c.680T>G (p.Ile227Ser)	Early infantile epileptic encephalopathy with suppression bursts|not provided|Severe myoclonic epilepsy in infancy	severe myoclonic epilepsy of infancy,Dravet syndrome or unspecified epilepsy	PMID:12821740,17054684,19589774,22050978,22147323,23195492	Pathogenic(Last reviewed: Jul 28, 2019)	2	166909376	2	166052866
NM_001165963.4(SCN1A):c.4906C>T (p.Arg1636Ter)	Early infantile epileptic encephalopathy with suppression bursts|not provided|Severe myoclonic epilepsy in infancy	classic or borderline Dravet syndrome	PMID:1868258,21248271,28202706	Pathogenic(Last reviewed: Feb 25, 2022)	2	166848879	2	165992369
NM_001165963.4(SCN1A):c.3705+1G>A	Severe myoclonic epilepsy in infancy|Generalized epilepsy with febrile seizures plus, type 2|Early infantile epileptic encephalopathy with suppression bursts	severe myoclonic epilepsy of infancy and infantile spasms and Dravet Syndrome	PMID:14504318,23808377,26096185	Pathogenic(Last reviewed: Sep 16, 2021)	2	166870253	2	166013743
NM_001165963.4(SCN1A):c.3637C>T (p.Arg1213Ter)	Seizure|Early infantile epileptic encephalopathy with suppression bursts|Severe myoclonic epilepsy in infancy|not provided	intractable epilepsy and Dravet syndrome	PMID:12566275,23934111,23195492,18930999	Pathogenic(Last reviewed: Jul 1, 2019)	2	166870322	2	166013812
NM_001165963.4(SCN1A):c.2593C>T (p.Arg865Ter)	Severe myoclonic epilepsy in infancy|not provided|Seizure|Early infantile epileptic encephalopathy with suppression bursts	Dravet syndrome, severe myoclonic epilepsy in infancy, and intractable epilepsy	PMID:12083760,23195492,21868258,18930999,18076640	Pathogenic(Last reviewed: Dec 1, 2021)	2	166894639	2	166038129
NM_001165963.4(SCN1A):c.4450_4453del (p.Asp1484fs)	History of neurodevelopmental disorder	Dravet syndrome and intractable childhood epilepsy	PMID:23195492	Pathogenic(Last reviewed: May 3, 2017)	2	166854571 - 166854574	2	165998061 - 165998064
NM_001165963.4(SCN1A):c.126del (p.Asp43fs)	Severe myoclonic epilepsy in infancy	Acute encephalopathy and Severe myoclonic epilepsy in infancy	PMID:20491869	Pathogenic(Last reviewed: Jan 25, 2017)	2	166930006	2	166073496
NM_001165963.4(SCN1A):c.652T>C (p.Phe218Leu)	History of neurodevelopmental disorder|not provided|Early infantile epileptic encephalopathy with suppression bursts	eneralized epilepsy with febrile seizures plus and Panayiotopoulos syndrome	PMID:19339291	Pathogenic/Likely pathogenic(Last reviewed: Sep 1, 2021)	2	166909404	2	166052894
NM_001165963.4(SCN1A):c.2528del (p.Ser843fs)	Generalized epilepsy with febrile seizures plus, type 2	SMEI with a benign outcome, in whom the clinical picture changed from SMEI in infancy to FS_x0001_ in adolescence and was associated with a novel, de novo truncating mutation of the SCN1A gene	PMID:16505326	Pathogenic(Last reviewed: Feb 28, 2006)	2	166895994	2	166039484
NM_001165963.4(SCN1A):c.434T>C (p.Met145Thr)	Febrile seizures, familial, 3a|Generalized epilepsy with febrile seizures plus, type 2|not provided	generalized epilepsy with febrile seizures plus (GEFS) and Dravet syndrome	PMID:11254444,12576172,22780858	Pathogenic(Last reviewed: Jun 8, 2016)	2	166912960	2	166056450
NM_001165963.4(SCN1A):c.5555T>C (p.Met1852Thr)	Severe myoclonic epilepsy in infancy|Generalized epilepsy with febrile seizures plus, type 1|Early infantile epileptic encephalopathy with suppression bursts	generalized epilepsy with febrile seizures and Dravet syndrome	PMID:12919402,26096185	Pathogenic(Last reviewed: Oct 14, 2021)	2	166848230	2	165991720
NM_001165963.4(SCN1A):c.5347G>A (p.Ala1783Thr)	Generalized epilepsy with febrile seizures plus, type 2|Early infantile epileptic encephalopathy with suppression bursts|Severe myoclonic epilepsy in infancy|not provided	Generalized epilepsy with febrile seizures plus, type 2,severe myoclonic epilepsy of infancy and Dravet syndrome	PMID:26096185,17347258,30321769	Pathogenic(Last reviewed: Mar 5, 2022)	2	166848438	2	165991928	父亲嵌合
NM_001165963.4(SCN1A):c.4985C>T (p.Ala1662Val)	Severe myoclonic epilepsy in infancy|History of neurodevelopmental disorder	febrile seizures as an infant and myoclonic seizures later in life	PMID:26096185	Pathogenic(Last reviewed: Jul 7, 2016)	2	166848800	2	165992290
NM_001165963.4(SCN1A):c.4943G>A (p.Arg1648His)	not provided|Generalized epilepsy with febrile seizures plus, type 2|Early infantile epileptic encephalopathy with suppression bursts|Autosomal dominant epilepsy|Severe myoclonic epilepsy in infancy	unaffected individual,GEFS+, Dravet syndrome and related seizure disorder phenotypes	PMID:10742094,18930999,20522430,29760947,30525188	Pathogenic(Last reviewed: Apr 23, 2021)	2	166848842	2	165992332
NM_001165963.4(SCN1A):c.4786C>T (p.Arg1596Cys)	Early infantile epileptic encephalopathy with suppression bursts|not provided|Severe myoclonic epilepsy in infancy|Focal epilepsy|Generalized epilepsy with febrile seizures plus, type 2	Generalized epilepsy with febrile seizures plus,focal epilepsy and Dravet syndrome	PMID:17347258,26188943,27781031,17903680	Pathogenic/Likely pathogenic(Last reviewed: Feb 26, 2020)	2	166850722	2	165994212
NM_001165963.4(SCN1A):c.3734G>A (p.Arg1245Gln)	Early infantile epileptic encephalopathy with suppression bursts|not provided|Generalized epilepsy with febrile seizures plus, type 2|Severe myoclonic epilepsy in infancy	Dravet syndrome or generalized epilepsy with febrile seizures plus (GEFS+)	PMID:17054684,21906962,28202706	Likely pathogenic(Last reviewed: Jan 13, 2022)	2	166868764	2	166012254
NM_001165963.4(SCN1A):c.2575C>T (p.Arg859Cys)	Early infantile epileptic encephalopathy with suppression bursts|Generalized epilepsy with febrile seizures plus, type 1|not provided|Seizure	Dravet syndrome or generalized epilepsy with febrile seizures	PMID:16525050,18930999	Pathogenic(Last reviewed: Mar 25, 2021)	2	166895947	2	166039437
NM_001165963.4(SCN1A):c.1177C>T (p.Arg393Cys)	Early infantile epileptic encephalopathy with suppression bursts|Severe myoclonic epilepsy in infancy|not provided|Intellectual disability, mild|Seizure	Lennox-Gastaut syndrome and Dravet syndrome	PMID:23934111,17054684,22848613,18930999,21868258	Pathogenic(Last reviewed: Oct 5, 2020)	2	166903480	2	166046970
NM_001165963.4(SCN1A):c.602+1G>A	Severe myoclonic epilepsy in infancy|Familial hemiplegic migraine type 3|Generalized epilepsy with febrile seizures plus, type 2|Autistic disorder|Global developmental delay|Seizure|Severe myoclonic epilepsy in infancy|Generalized epilepsy with febrile seizures plus, type 2|not provided|Focal impaired awareness seizure|Early infantile epileptic encephalopathy with suppression bursts	Dravet syndrome and intractable childhood epilepsies with frequent generalized tonic-clonic seizures	PMID:20522430,12566275,28148630	Pathogenic(Last reviewed: Oct 1, 2021)	2	166911147	2	166054637
NM_001165963.4(SCN1A):c.383+1A>G	Early infantile epileptic encephalopathy with suppression bursts|Severe myoclonic epilepsy in infancy|History of neurodevelopmental disorder	early infantile epileptic encephalopathy or Dravet syndrome	PMID:Â¬â€ 23884151,19782004	Pathogenic(Last reviewed: Sep 11, 2018)	2	166915079	2	166058569
NM_001165963.4(SCN1A):c.5218G>A (p.Asp1740Asn)	Autosomal dominant epilepsy|Early infantile epileptic encephalopathy with suppression bursts|not provided	febrile seizures plus and/or neurodevelopmental disorders	PMID:28842445,29655203	Pathogenic/Likely pathogenic(Last reviewed: Jun 30, 2020)	2	166848567	2	165992057
NM_001165963.4(SCN1A):c.4907G>A (p.Arg1636Gln)	Epileptic encephalopathy Lennox-Gastaut type|Inborn genetic diseases|Early infantile epileptic encephalopathy with suppression bursts|not provided	Lennox-Gastaut syndrome and seizures or early infantile epileptic encephalopathy	PMID:17347258,19589774,26633542	Pathogenic/Likely pathogenic(Last reviewed: Dec 10, 2018)	2	166848878	2	165992368
