# Supplementary material for: Research on the distribution ratio of variants and the proportion of variant types in different conditions of SCN1A Seizure Disorders using ClinVar
Source: Research Square preprint supplement (doi:10.21203/rs.3.rs-1664068/v1), 2022-05-31
Supplement: Supplementary file 3 [file f8b6df7679ad64bbfe6ceec7.xlsx]

## Sheet: Sheet1
Supplementary Table 2 Raw data for 291 SCN1A variants validated by case reports associated with DS/SMEI
Name	Condition(s)	Condition of case report	Case report	Clinical significance (Last reviewed)	GRCh37Chromosome	GRCh37Location	GRCh38Chromosome	GRCh38Location
NM_001165963.4(SCN1A):c.5597A>G (p.Asp1866Gly)	Early infantile epileptic encephalopathy with suppression bursts	Dravet syndrome	PMID:28012175	Likely pathogenic(Last reviewed: Nov 14, 2017)	2	166848188	2	165991678
NM_001165963.4(SCN1A):c.5374G>A (p.Ala1792Thr)	Early infantile epileptic encephalopathy with suppression bursts	Dravet syndrome	PMID:23195492	Pathogenic(Last reviewed: Oct 27, 2021)	2	166848411	2	165991901
NM_001165963.4(SCN1A):c.5341T>C (p.Tyr1781His)	Familial hemiplegic migraine type 3|Early infantile epileptic encephalopathy with suppression bursts	Dravet syndrome	PMID:18930999	Pathogenic(Last reviewed: Oct 23, 2021)	2	166848444	2	165991934
NM_001165963.4(SCN1A):c.5318C>A (p.Ser1773Tyr)	Early infantile epileptic encephalopathy with suppression bursts	severe myoclonic epilepsy of infancy	PMID:17054684	Likely pathogenic(Last reviewed: Sep 21, 2018)	2	166848467	2	165991957
NM_001165963.4(SCN1A):c.5269G>A (p.Gly1757Arg)	Early infantile epileptic encephalopathy with suppression bursts	Dravet syndrome	PMID:27781031,27465585	Pathogenic(Last reviewed: Aug 30, 2021)	2	166848516	2	165992006
NM_001165963.4(SCN1A):c.5179G>T (p.Asp1727Tyr)	Early infantile epileptic encephalopathy with suppression bursts	Dravet syndrome	PMID:31001185	Likely pathogenic(Last reviewed: Dec 3, 2019)	2	166848606	2	165992096
NM_001165963.4(SCN1A):c.5048T>C (p.Ile1683Thr)	Early infantile epileptic encephalopathy with suppression bursts	Dravet syndrome	PMID:21248271,25459968	Pathogenic(Last reviewed: Oct 20, 2020)	2	166848737	2	165992227
NM_001165963.4(SCN1A):c.4979T>C (p.Leu1660Pro)	not provided|Early infantile epileptic encephalopathy with suppression bursts	Dravet syndrome	PMID:21248271,22409937,23895530	Pathogenic(Last reviewed: Dec 10, 2021)	2	166848806	2	165992296
NM_001165963.4(SCN1A):c.4973C>A (p.Thr1658Lys)	Early infantile epileptic encephalopathy with suppression bursts	Dravet syndrome	PMID:31439038	Pathogenic(Last reviewed: Jan 17, 2020)	2	166848812	2	165992302
NM_001165963.4(SCN1A):c.4921G>A (p.Ala1641Thr)	Early infantile epileptic encephalopathy with suppression bursts	Dravet syndrome	PMID:29142202	Pathogenic(Last reviewed: Nov 25, 2021)	2	166848864	2	165992354
NM_001165963.4(SCN1A):c.4631A>G (p.Asp1544Gly)	Early infantile epileptic encephalopathy with suppression bursts	Dravet syndrome	PMID:Â¬â€ 21248271	Likely pathogenic(Last reviewed: Nov 6, 2018)	2	166850877	2	165994367
NM_001165963.4(SCN1A):c.4453A>G (p.Asn1485Asp)	Early infantile epileptic encephalopathy with suppression bursts	Dravet syndrome	PMID:23708187	Likely pathogenic(Last reviewed: Oct 16, 2017)	2	166854571	2	165998061
NM_001165963.4(SCN1A):c.4360G>A (p.Glu1454Lys)	Early infantile epileptic encephalopathy with suppression bursts	Dravet syndrome	PMID:21248271	Pathogenic(Last reviewed: Oct 8, 2021)	2	166854664	2	165998154
NM_001165963.4(SCN1A):c.4313T>C (p.Met1438Thr)	Early infantile epileptic encephalopathy with suppression bursts	Dravet syndrome	PMID:28079314,30805006	Pathogenic(Last reviewed: Dec 3, 2021)	2	166856258	2	165999748
NM_001165963.4(SCN1A):c.4109C>T (p.Ala1370Val)	Early infantile epileptic encephalopathy with suppression bursts	severe myoclonic epilepsy of infancy	PMID:22028529	Pathogenic(Last reviewed: Jun 20, 2017)	2	166859157	2	166002647
NM_001165963.4(SCN1A):c.3965G>C (p.Arg1322Thr)	Early infantile epileptic encephalopathy with suppression bursts	Dravet syndrome	PMID: 27541642	Pathogenic(Last reviewed: Dec 2, 2021)	2	166866266	2	166009756
NM_001165963.4(SCN1A):c.2983T>C (p.Phe995Leu)	Early infantile epileptic encephalopathy with suppression bursts	Dravet syndrome	PMID:28012175,30182498	Pathogenic(Last reviewed: Oct 29, 2019)	2	166893004	2	166036494
NM_001165963.4(SCN1A):c.2947G>T (p.Val983Phe)	Early infantile epileptic encephalopathy with suppression bursts	Dravet syndrome	PMID:22140375	Likely pathogenic(Last reviewed: Sep 11, 2019)	2	166893040	2	166036530
NM_001165963.4(SCN1A):c.2928G>A (p.Met976Ile)	Early infantile epileptic encephalopathy with suppression bursts	Dravet syndrome	PMID:22071555,19522081	Likely pathogenic(Last reviewed: Oct 24, 2019)	2	166894304	2	166037794
NM_001165963.4(SCN1A):c.2848G>A (p.Gly950Arg)	Early infantile epileptic encephalopathy with suppression bursts	Dravet syndrome	PMID: 21248271	Likely pathogenic(Last reviewed: Feb 19, 2020)	2	166894384	2	166037874
NM_001165963.4(SCN1A):c.2796G>T (p.Trp932Cys)	Early infantile epileptic encephalopathy with suppression bursts	Dravet syndrome	PMID: 21248271	Likely pathogenic(Last reviewed: Mar 20, 2020)	2	166894436	2	166037926
NM_001165963.4(SCN1A):c.2729A>T (p.Gln910Leu)	Early infantile epileptic encephalopathy with suppression bursts	Dravet syndrome	PMID: Â¬â€ 28012175	Likely pathogenic(Last reviewed: Aug 6, 2018)	2	166894503	2	166037993
NM_001165963.4(SCN1A):c.2669T>C (p.Leu890Pro)	Early infantile epileptic encephalopathy with suppression bursts	Dravet syndrome	PMID:21248271	Pathogenic(Last reviewed: Jul 18, 2018)	2	166894563	2	166038053
NM_001165963.4(SCN1A):c.1178G>C (p.Arg393Pro)	Early infantile epileptic encephalopathy with suppression bursts	severe myoclonic epilepsy of infancy (SMEI),borderline phenotype (SMEB) and Dravet syndrome	PMID:12754708,23195492,22780858,28544625	Pathogenic(Last reviewed: Jun 22, 2019)	2	166903479	2	166046969
NM_001165963.4(SCN1A):c.1121C>A (p.Ser374Tyr)	Early infantile epileptic encephalopathy with suppression bursts	Dravet syndrome	PMID:27465585	Likely pathogenic(Last reviewed: May 21, 2019)	2	166904186	2	166047676
NM_001165963.4(SCN1A):c.1087A>C (p.Thr363Pro)	Early infantile epileptic encephalopathy with suppression bursts|not provided	severe myoclonic epilepsy of infancy	PMID:23195492	Pathogenic/Likely pathogenic(Last reviewed: Jul 24, 2020)	2	166904220	2	166047710
NM_001165963.4(SCN1A):c.974A>G (p.Tyr325Cys)	Early infantile epileptic encephalopathy with suppression bursts	Dravet syndrome	PMID:23821540	Pathogenic(Last reviewed: Apr 23, 2019)	2	166905450	2	166048940
NM_001165963.4(SCN1A):c.935T>C (p.Phe312Ser)	Early infantile epileptic encephalopathy with suppression bursts	Dravet syndrome	PMID:28012175,31864146	Pathogenic(Last reviewed: Nov 11, 2021)	2	166908258	2	166051748
NM_001165963.4(SCN1A):c.243C>A (p.Asp81Glu)	Early infantile epileptic encephalopathy with suppression bursts	Dravet syndrome	PMID:29745119,26169758	Pathogenic(Last reviewed: Oct 20, 2020)	2	166929889	2	166073379
NM_001165963.4(SCN1A):c.2T>C (p.Met1Thr)	Early infantile epileptic encephalopathy with suppression bursts|not provided	Dravet syndrome	PMID:21248271	Pathogenic/Likely pathogenic(Last reviewed: Nov 1, 2017)	2	166930130	2	166073620
NM_001165963.4(SCN1A):c.5052C>A (p.Tyr1684Ter)	Early infantile epileptic encephalopathy with suppression bursts	Dravet syndrome	PMID:21248271	Pathogenic(Last reviewed: Aug 19, 2021)	2	166848733	2	165992223
NM_001165963.4(SCN1A):c.4852+1G>A	Early infantile epileptic encephalopathy with suppression bursts	Dravet syndrome	PMID:21248271,28202706	Pathogenic(Last reviewed: Feb 6, 2020)	2	166850655	2	165994145
NM_001165963.4(SCN1A):c.4582-1G>C	Early infantile epileptic encephalopathy with suppression bursts	Dravet syndrome	PMID:30185235	Pathogenic(Last reviewed: Oct 5, 2021)	2	166850927	2	165994417
NM_001165963.4(SCN1A):c.4339-1G>A	Early infantile epileptic encephalopathy with suppression bursts	Dravet syndrome/severe myoclonic epilepsy of infancy	PMID:12821740,29142202	Pathogenic(Last reviewed: Jan 27, 2020)	2	166854686	2	165998176
NM_001165963.4(SCN1A):c.4224G>A (p.Trp1408Ter)	not provided|Early infantile epileptic encephalopathy with suppression bursts	Dravet syndrome	PMID:26096185,12566275	Pathogenic(Last reviewed: Nov 3, 2019)	2	166859042	2	166002532
NM_001165963.4(SCN1A):c.4002+2T>C	Early infantile epileptic encephalopathy with suppression bursts	Dravet syndrome	PMID:21248271	Pathogenic(Last reviewed: Mar 20, 2018)	2	166866227	2	166009717
NM_001165963.4(SCN1A):c.3880-1G>T	Early infantile epileptic encephalopathy with suppression bursts	Dravet syndrome	PMID:18930999	Pathogenic(Last reviewed: Apr 1, 2018)	2	166866352	2	166009842
NM_001165963.4(SCN1A):c.3869T>A (p.Leu1290Ter)	Early infantile epileptic encephalopathy with suppression bursts	Dravet syndrome	PMID:28202706	Pathogenic(Last reviewed: Feb 4, 2020)	2	166868629	2	166012119
NM_001165963.4(SCN1A):c.3829C>T (p.Gln1277Ter)	Early infantile epileptic encephalopathy with suppression bursts	Dravet syndrome	PMID:18076640	Pathogenic(Last reviewed: Aug 14, 2019)	2	166868669	2	166012159
NM_001165963.4(SCN1A):c.3812G>A (p.Trp1271Ter)	Early infantile epileptic encephalopathy with suppression bursts	Dravet syndrome	PMID:18076640,12083760	Pathogenic(Last reviewed: Jul 24, 2018)	2	166868686	2	166012176
NM_001165963.4(SCN1A):c.3783C>A (p.Tyr1261Ter)	Early infantile epileptic encephalopathy with suppression bursts	Dravet syndrome	PMID:18930999	Pathogenic(Last reviewed: Jul 26, 2021)	2	166868715	2	166012205
NM_001165963.4(SCN1A):c.3706-1G>C	Early infantile epileptic encephalopathy with suppression bursts	evere myoclonic epilepsy of infancy	PMID:17054684	Pathogenic(Last reviewed: Sep 17, 2019)	2	166868793	2	166012283
NM_001165963.4(SCN1A):c.3706-2A>T	Early infantile epileptic encephalopathy with suppression bursts	Dravet syndrome	PMID:19763161	Pathogenic(Last reviewed: Dec 27, 2019)	2	166868794	2	166012284
NM_001165963.4(SCN1A):c.3705+1G>T	Early infantile epileptic encephalopathy with suppression bursts	severe myoclonic epilepsy of infancy (SMEI)	PMID:12821740	Pathogenic(Last reviewed: Mar 19, 2018)	2	166870253	2	166013743
NM_001165963.4(SCN1A):c.3550+2T>C	Early infantile epileptic encephalopathy with suppression bursts	Dravet syndrome	PMID:22780858	Pathogenic(Last reviewed: Dec 26, 2018)	2	166872115	2	166015605
NM_001165963.4(SCN1A):c.3183T>A (p.Cys1061Ter)	Early infantile epileptic encephalopathy with suppression bursts	Dravet syndrome	PMID:18930999	Pathogenic(Last reviewed: Oct 18, 2019)	2	166892804	2	166036294
NM_001165963.4(SCN1A):c.2893C>T (p.Gln965Ter)	Early infantile epileptic encephalopathy with suppression bursts	severe myoclonic epilepsy in infancy	PMID:17347258	Pathogenic(Last reviewed: Apr 25, 2019)	2	166894339	2	166037829
NM_001165963.4(SCN1A):c.2796G>A (p.Trp932Ter)	Early infantile epileptic encephalopathy with suppression bursts	Dravet syndrome	PMID:12754708,24656210	Pathogenic(Last reviewed: Sep 1, 2019)	2	166894436	2	166037926
NM_001165963.4(SCN1A):c.2496G>A (p.Trp832Ter)	Early infantile epileptic encephalopathy with suppression bursts	Dravet syndrome	PMID:18930999	Pathogenic(Last reviewed: Mar 2, 2020)	2	166896026	2	166039516
NM_001165963.4(SCN1A):c.2495G>A (p.Trp832Ter)	Early infantile epileptic encephalopathy with suppression bursts	Dravet syndrome	PMID:Â¬â€ 18930999	Pathogenic(Last reviewed: Dec 26, 2018)	2	166896027	2	166039517
NM_001165963.4(SCN1A):c.2243G>A (p.Trp748Ter)	Early infantile epileptic encephalopathy with suppression bursts	severe myoclonic epilepsy of infancy	PMID:23195492	Pathogenic(Last reviewed: Jan 26, 2019)	2	166897913	2	166041403
NM_001165963.4(SCN1A):c.2044-1G>A	Early infantile epileptic encephalopathy with suppression bursts	Dravet syndrome	PMID:24623842	Pathogenic(Last reviewed: Oct 29, 2019)	2	166898935	2	166042425
NM_001165963.4(SCN1A):c.1170+1G>A	Early infantile epileptic encephalopathy with suppression bursts|not provided	evere myoclonic epilepsy of infancy (SMEI)	PMID:18413471	Pathogenic(Last reviewed: Jul 14, 2021)	2	166904136	2	166047626
NM_001165963.4(SCN1A):c.603-1G>A	Early infantile epileptic encephalopathy with suppression bursts|not provided	Dravet syndrome	PMID:21719429,27864847	Pathogenic(Last reviewed: Mar 3, 2020)	2	166909454	2	166052944
NM_001165963.4(SCN1A):c.602+1G>C	not provided|Early infantile epileptic encephalopathy with suppression bursts	Dravet syndrome	PMID:27465585	Pathogenic(Last reviewed: Aug 4, 2020)	2	166911147	2	166054637
NM_001165963.4(SCN1A):c.576G>A (p.Trp192Ter)	Early infantile epileptic encephalopathy with suppression bursts	Dravet syndrome	PMID:18930999	Pathogenic(Last reviewed: Oct 22, 2019)	2	166911174	2	166054664
NM_001165963.4(SCN1A):c.575G>A (p.Trp192Ter)	Early infantile epileptic encephalopathy with suppression bursts	Dravet syndrome	PMID:18930999	Pathogenic(Last reviewed: Dec 3, 2019)	2	166911175	2	166054665
NM_001165963.4(SCN1A):c.474-1G>A	Early infantile epileptic encephalopathy with suppression bursts	Dravet syndrome	PMID:21248271,29314583	Pathogenic(Last reviewed: Jun 21, 2019)	2	166911277	2	166054767
NM_001165963.4(SCN1A):c.459G>A (p.Trp153Ter)	Early infantile epileptic encephalopathy with suppression bursts	Dravet Syndrome	PMID:29141279	Pathogenic(Last reviewed: Apr 15, 2019)	2	166912935	2	166056425
NM_001165963.4(SCN1A):c.383C>A (p.Ser128Ter)	Early infantile epileptic encephalopathy with suppression bursts	Dravet syndrome	PMID:12821740,24623842	Pathogenic(Last reviewed: Aug 28, 2021)	2	166915080	2	166058570
NM_001165963.4(SCN1A):c.265-1G>A	Early infantile epileptic encephalopathy with suppression bursts|not provided	Dravet syndrome	PMID:1734725	Pathogenic(Last reviewed: Nov 26, 2019)	2	166915199	2	166058689
NM_001165963.4(SCN1A):c.5708_5711dup (p.Pro1905fs)	not provided|Early infantile epileptic encephalopathy with suppression bursts	severe myoclonic epilepsy in infancy	PMID:11940708	Pathogenic(Last reviewed: Apr 9, 2020)	2	166848073 - 166848074	2	165991563 - 165991564
NM_001165963.4(SCN1A):c.5488_5489del (p.Gln1830fs)	Early infantile epileptic encephalopathy with suppression bursts	Dravet syndrome	PMID:23808377	Pathogenic(Last reviewed: Oct 24, 2020)	2	166848296 - 166848297	2	165991786 - 165991787
NM_001165963.4(SCN1A):c.4581+2del	Early infantile epileptic encephalopathy with suppression bursts	Dravet syndrome	PMID:23195492,18930999	Pathogenic(Last reviewed: Dec 11, 2019)	2	166852521	2	165996011
NM_001165963.4(SCN1A):c.3282del (p.Lys1094fs)	Early infantile epileptic encephalopathy with suppression bursts	Dravet syndrome	PMID:28202706	Pathogenic(Last reviewed: May 20, 2019)	2	166892705	2	166036195
NM_001165963.4(SCN1A):c.1724del (p.Phe575fs)	Early infantile epileptic encephalopathy with suppression bursts	Dravet syndrome	PMID:24328833	Pathogenic(Last reviewed: Oct 16, 2021)	2	166900498	2	166043988
NM_001165963.4(SCN1A):c.1539del (p.Glu514fs)	Early infantile epileptic encephalopathy with suppression bursts	Dravet syndrome	PMID:Â¬â€ 2510811	Pathogenic(Last reviewed: Nov 9, 2018)	2	166901676	2	166045166
NM_001165963.4(SCN1A):c.1301dup (p.Leu434fs)	Early infantile epileptic encephalopathy with suppression bursts	Dravet Syndrome	PMID:26096185	Pathogenic(Last reviewed: Nov 18, 2021)	2	166903355 - 166903356	2	166046845 - 166046846
NM_001165963.4(SCN1A):c.1118dup (p.Leu373fs)	Early infantile epileptic encephalopathy with suppression bursts	Dravet Syndrome	PMID:26096185	Pathogenic(Last reviewed: May 3, 2018)	2	166904188 - 166904189	2	166047678 - 166047679
NM_001165963.4(SCN1A):c.5780G>C (p.Arg1927Thr)	Severe myoclonic epilepsy in infancy	Dravet Syndrome	PMID:26096185	Pathogenic(Last reviewed: Dec 20, 2014)	2	166848005	2	165991495
NM_001165963.4(SCN1A):c.5726C>T (p.Thr1909Ile)	not provided|Severe myoclonic epilepsy in infancy|Early infantile epileptic encephalopathy with suppression bursts	Dravet syndrome	PMID:28708303	Pathogenic/Likely pathogenic(Last reviewed: May 1, 2018)	2	166848059	2	165991549
NM_001165963.4(SCN1A):c.5515C>G (p.Leu1839Val)	Severe myoclonic epilepsy in infancy	Dravet Syndrome	PMID:26096185	Pathogenic(Last reviewed: Dec 20, 2014)	2	166848270	2	165991760
NM_001165963.4(SCN1A):c.5434T>G (p.Trp1812Gly)	Severe myoclonic epilepsy in infancy|Seizure|not provided	severe myoclonic epilepsy in infancy (SMEI)	PMID:12566275	Likely pathogenic(Last reviewed: Mar 2, 2017)	2	166848351	2	165991841
NM_001165963.4(SCN1A):c.5351T>C (p.Val1784Ala)	Severe myoclonic epilepsy in infancy	Dravet syndrome	PMID:12566275	Likely pathogenic(Last reviewed: May 1, 2016)	2	166848434	2	165991924
NM_001165963.4(SCN1A):c.5348C>T (p.Ala1783Val)	not provided|Early infantile epileptic encephalopathy with suppression bursts|Severe myoclonic epilepsy in infancy	Dravet syndrome	PMID:18930999,29460957,17561957	Pathogenic(Last reviewed: Sep 20, 2020)	2	166848437	2	165991927
NM_001165963.4(SCN1A):c.5346C>G (p.Ile1782Met)	Severe myoclonic epilepsy in infancy	Dravet Syndrome	PMID:26096185	Pathogenic(Last reviewed: Dec 20, 2014)	2	166848439	2	165991929
NM_001165963.4(SCN1A):c.5264A>G (p.Asp1755Gly)	Severe myoclonic epilepsy in infancy	Dravet Syndrome	PMID:26096185	Pathogenic(Last reviewed: Dec 20, 2014)	2	166848521	2	165992011
NM_001165963.4(SCN1A):c.5222G>A (p.Cys1741Tyr)	Severe myoclonic epilepsy in infancy|not provided	Dravet Syndrome	PMID:26096185	Pathogenic(Last reviewed: Dec 20, 2014)	2	166848563	2	165992053
NM_001165963.4(SCN1A):c.5108A>T (p.Asp1703Val)	Severe myoclonic epilepsy in infancy	Dravet Syndrome	PMID:26096185	Pathogenic(Last reviewed: Dec 20, 2014)	2	166848677	2	165992167
NM_001165963.4(SCN1A):c.5106T>A (p.Asp1702Glu)	Severe myoclonic epilepsy in infancy	Dravet Syndrome	PMID:26096185	Pathogenic(Last reviewed: Dec 20, 2014)	2	166848679	2	165992169
NM_001165963.4(SCN1A):c.5075T>C (p.Phe1692Ser)	Severe myoclonic epilepsy in infancy	severe myoclonic epilepsy in infancy (SMEI)	PMID:14738421	Likely pathogenic(Last reviewed: May 28, 2019)	2	166848710	2	165992200
NM_001165963.4(SCN1A):c.5063G>T (p.Gly1688Val)	Severe myoclonic epilepsy in infancy	Dravet Syndrome	PMID:26096185	Pathogenic(Last reviewed: Dec 20, 2014)	2	166848722	2	165992212
NM_001165963.4(SCN1A):c.5014A>C (p.Asn1672His)	Severe myoclonic epilepsy in infancy	Dravet Syndrome	PMID:26096185	Pathogenic(Last reviewed: Dec 20, 2014)	2	166848771	2	165992261
NM_001165963.4(SCN1A):c.5003C>G (p.Pro1668Arg)	Severe myoclonic epilepsy in infancy	Dravet Syndrome	PMID:26096185	Pathogenic(Last reviewed: Dec 20, 2014)	2	166848782	2	165992272
NM_001165963.4(SCN1A):c.4997C>T (p.Ser1666Phe)	Severe myoclonic epilepsy in infancy	Dravet Syndrome	PMID:26096185	Pathogenic/Likely pathogenic(Last reviewed: Jan 1, 2018)	2	166848788	2	165992278
NM_001165963.4(SCN1A):c.4934G>C (p.Arg1645Pro)	Severe myoclonic epilepsy in infancy	Dravet Syndrome	PMID:26096185	Pathogenic(Last reviewed: Dec 20, 2014)	2	166848851	2	165992341
NM_001165963.4(SCN1A):c.4934G>A (p.Arg1645Gln)	Severe myoclonic epilepsy in infancy|History of neurodevelopmental disorder|Early infantile epileptic encephalopathy with suppression bursts|not provided|Familial hemiplegic migraine type 3|Generalized epilepsy with febrile seizures plus, type 2|Severe myoclonic epilepsy in infancy|Familial hemiplegic migraine type 3	Dravet syndrome	PMID:17347258,27864847	Pathogenic(Last reviewed: Sep 30, 2020)	2	166848851	2	165992341
NM_001165963.4(SCN1A):c.4766T>G (p.Val1589Gly)	Severe myoclonic epilepsy in infancy	Dravet Syndrome	PMID:26096185	Pathogenic(Last reviewed: Dec 20, 2014)	2	166850742	2	165994232
NM_001165963.4(SCN1A):c.4757G>A (p.Gly1586Glu)	Severe myoclonic epilepsy in infancy	Dravet Syndrome	PMID:26096185	Pathogenic(Last reviewed: Dec 20, 2014)	2	166850751	2	165994241
NM_001165963.4(SCN1A):c.4547C>G (p.Ser1516Trp)	Severe myoclonic epilepsy in infancy	Dravet Syndrome	PMID:26096185	Pathogenic(Last reviewed: Dec 20, 2014)	2	166852557	2	165996047
NM_001165963.4(SCN1A):c.4412C>T (p.Ser1471Phe)	Severe myoclonic epilepsy in infancy	Dravet Syndrome	PMID:26096185	Pathogenic(Last reviewed: Apr 25, 2021)	2	166854612	2	165998102
NM_001165963.4(SCN1A):c.4352C>T (p.Pro1451Leu)	Early infantile epileptic encephalopathy with suppression bursts|Severe myoclonic epilepsy in infancy	severe myoclonic epilepsy in infancy (SMEI) also known as Dravet syndrome	PMID:17054684	Pathogenic/Likely pathogenic(Last reviewed: Nov 16, 2018)	2	166854672	2	165998162
NM_001165963.4(SCN1A):c.4298G>A (p.Gly1433Glu)	Severe myoclonic epilepsy in infancy|Early infantile epileptic encephalopathy with suppression bursts|not provided	Dravet syndrome	PMID:23762420,18554359	Pathogenic(Last reviewed: Jul 30, 2019)	2	166856273	2	165999763
NM_001165963.4(SCN1A):c.4168G>C (p.Val1390Leu)	Severe myoclonic epilepsy in infancy	Dravet syndrome	PMID:26096185	Pathogenic(Last reviewed: Dec 20, 2014)	2	166859098	2	166002588
NM_001165963.4(SCN1A):c.4168G>A (p.Val1390Met)	Early infantile epileptic encephalopathy with suppression bursts|not provided|Severe myoclonic epilepsy in infancy	Dravet syndrome;	PMID:12083760,20431604,23762420,22780858,29141279	Pathogenic(Last reviewed: Nov 15, 2021)	2	166859098	2	166002588
NM_001165963.4(SCN1A):c.4088T>A (p.Ile1363Asn)	Severe myoclonic epilepsy in infancy	Dravet syndrome;	PMID:26096185	Pathogenic(Last reviewed: Dec 20, 2014)	2	166859178	2	166002668
NM_001165963.4(SCN1A):c.4086C>G (p.Ser1362Arg)	Severe myoclonic epilepsy in infancy	Dravet syndrome;	PMID:26096185	Pathogenic(Last reviewed: Dec 20, 2014)	2	166859180	2	166002670
NM_001165963.4(SCN1A):c.4044G>A (p.Met1348Ile)	Severe myoclonic epilepsy in infancy	Dravet syndrome;	PMID:26096185	Pathogenic(Last reviewed: Dec 20, 2014)	2	166859222	2	166002712
NM_001165963.4(SCN1A):c.4016C>T (p.Ala1339Val)	Severe myoclonic epilepsy in infancy	Dravet syndrome;	PMID:26096185	Pathogenic(Last reviewed: Dec 20, 2014)	2	166859250	2	166002740
NM_001165963.4(SCN1A):c.4003G>A (p.Val1335Met)	Early infantile epileptic encephalopathy with suppression bursts|Severe myoclonic epilepsy in infancy	severe myoclonic epilepsy of infancy or Dravet syndrome	PMID:18413471,18554359	Pathogenic(Last reviewed: Jun 4, 2019)	2	166859263	2	166002753
NM_001165963.4(SCN1A):c.3968C>A (p.Pro1323His)	History of neurodevelopmental disorder|not provided	Dravet syndrome	PMID:24472396	Likely pathogenic(Last reviewed: Apr 28, 2017)	2	166866263	2	166009753
NM_001165963.4(SCN1A):c.3899C>G (p.Thr1300Arg)	Severe myoclonic epilepsy in infancy	Dravet syndrome;	PMID:26096185	Pathogenic(Last reviewed: Dec 20, 2014)	2	166866332	2	166009822
NM_001165963.4(SCN1A):c.3821A>C (p.Tyr1274Ser)	Severe myoclonic epilepsy in infancy	Dravet syndrome;	PMID:26096185	Pathogenic(Last reviewed: Dec 20, 2014)	2	166868677	2	166012167
NM_001165963.4(SCN1A):c.3818C>T (p.Ala1273Val)	Severe myoclonic epilepsy in infancy|not provided	Dravet syndrome;	PMID:26096185	Pathogenic/Likely pathogenic(Last reviewed: Apr 6, 2016)	2	166868680	2	166012170
NM_001165963.4(SCN1A):c.3778A>C (p.Thr1260Pro)	Severe myoclonic epilepsy in infancy	Dravet syndrome;	PMID:26096185	Pathogenic(Last reviewed: Dec 20, 2014)	2	166868720	2	166012210
NM_001165963.4(SCN1A):c.3763G>C (p.Ala1255Pro)	Severe myoclonic epilepsy in infancy	Dravet syndrome;	PMID:26096185	Pathogenic(Last reviewed: Dec 20, 2014)	2	166868735	2	166012225
NM_001165963.4(SCN1A):c.3629C>A (p.Thr1210Lys)	Severe myoclonic epilepsy in infancy	Dravet syndrome;	PMID:26096185	Pathogenic(Last reviewed: Dec 20, 2014)	2	166870330	2	166013820
NM_001165963.4(SCN1A):c.2956C>T (p.Leu986Phe)	Early infantile epileptic encephalopathy with suppression bursts|Severe myoclonic epilepsy in infancy	severe myoclonic epilepsy of infancyÂ¬â€	PMID:11359211	Pathogenic(Last reviewed: Aug 28, 2018)	2	166893031	2	166036521
NM_001165963.4(SCN1A):c.2936G>A (p.Gly979Glu)	Severe myoclonic epilepsy in infancy	Dravet syndrome;	PMID:26096185	Pathogenic(Last reviewed: Dec 20, 2014)	2	166894296	2	166037786
NM_001165963.4(SCN1A):c.2929G>A (p.Val977Met)	Severe myoclonic epilepsy in infancy	Dravet syndrome;	PMID:26096185	Pathogenic(Last reviewed: Dec 20, 2014)	2	166894303	2	166037793
NM_001165963.4(SCN1A):c.2903G>T (p.Cys968Phe)	Severe myoclonic epilepsy in infancy	Dravet syndrome;	PMID:26096185	Pathogenic(Last reviewed: Dec 20, 2014)	2	166894329	2	166037819
NM_001165963.4(SCN1A):c.2879T>G (p.Met960Arg)	Severe myoclonic epilepsy in infancy	Dravet syndrome;	PMID:26096185	Pathogenic(Last reviewed: Dec 20, 2014)	2	166894353	2	166037843
NM_001165963.4(SCN1A):c.2875T>C (p.Cys959Arg)	Severe myoclonic epilepsy in infancy|Early infantile epileptic encephalopathy with suppression bursts	Dravet syndrome	PMID:12754708	Pathogenic/Likely pathogenic(Last reviewed: Sep 11, 2020)	2	166894357	2	166037847
NM_001165963.4(SCN1A):c.2860G>A (p.Glu954Lys)	Severe myoclonic epilepsy in infancy|Early infantile epileptic encephalopathy with suppression bursts	Dravet syndrome or severe myoclonic epilepsy of infancy	PMID:20110217,21248271	Pathogenic(Last reviewed: Sep 7, 2020)	2	166894372	2	166037862
NM_001165963.4(SCN1A):c.2854T>G (p.Trp952Gly)	Severe myoclonic epilepsy in infancy	Dravet syndrome	PMID:26096185	Pathogenic(Last reviewed: Dec 20, 2014)	2	166894378	2	166037868
NM_001165963.4(SCN1A):c.2837G>C (p.Arg946Pro)	Severe myoclonic epilepsy in infancy	Dravet syndrome	PMID:26096185	Pathogenic(Last reviewed: Dec 20, 2014)	2	166894395	2	166037885
NM_001165963.4(SCN1A):c.2836C>T (p.Arg946Cys)	Early infantile epileptic encephalopathy with suppression bursts|not provided|Generalized epilepsy with febrile seizures plus, type 2|Severe myoclonic epilepsy in infancy	Dravet syndromeÂ¬â€	PMID:14738421,21864321,23195492	Pathogenic(Last reviewed: Nov 21, 2019)	2	166894396	2	166037886
NM_001165963.4(SCN1A):c.2815C>T (p.His939Tyr)	Severe myoclonic epilepsy in infancy|not provided	Dravet syndrome	PMID:26096185	Pathogenic/Likely pathogenic(Last reviewed: Mar 14, 2019)	2	166894417	2	166037907
NM_001165963.4(SCN1A):c.2792G>C (p.Arg931Pro)	Early infantile epileptic encephalopathy with suppression bursts|Severe myoclonic epilepsy in infancy	Dravet syndrome	PMID:26096185	Pathogenic/Likely pathogenic(Last reviewed: Oct 14, 2020)	2	166894440	2	166037930
NM_001165963.4(SCN1A):c.2791C>T (p.Arg931Cys)	Early infantile epileptic encephalopathy with suppression bursts|Severe myoclonic epilepsy in infancy|not provided	Dravet syndrome	PMID:12083760,18076640	Pathogenic/Likely pathogenic(Last reviewed: Jun 21, 2020)	2	166894441	2	166037931
NM_001165963.4(SCN1A):c.2780G>T (p.Cys927Phe)	Severe myoclonic epilepsy in infancy	Dravet syndrome	PMID:26096185	Pathogenic(Last reviewed: Dec 20, 2014)	2	166894452	2	166037942
NM_001165963.4(SCN1A):c.2728C>A (p.Gln910Lys)	Severe myoclonic epilepsy in infancy	Dravet syndrome	PMID:26096185	Pathogenic(Last reviewed: Dec 20, 2014)	2	166894504	2	166037994
NM_001165963.4(SCN1A):c.2690T>C (p.Leu897Ser)	Severe myoclonic epilepsy in infancy	Dravet syndrome	PMID:26096185	Pathogenic(Last reviewed: Dec 20, 2014)	2	166894542	2	166038032
NM_001165963.4(SCN1A):c.2615C>A (p.Ser872Tyr)	not provided|Severe myoclonic epilepsy in infancy	Dravet syndrome	PMID:26096185	Pathogenic/Likely pathogenic(Last reviewed: Feb 1, 2021)	2	166894617	2	166038107
NM_001165963.4(SCN1A):c.2588T>G (p.Leu863Trp)	Severe myoclonic epilepsy in infancy	Dravet syndrome	PMID:26096185	Pathogenic(Last reviewed: Dec 20, 2014)	2	166895934	2	166039424
NM_001165963.4(SCN1A):c.2537A>G (p.Glu846Gly)	Severe myoclonic epilepsy in infancy	Dravet syndrome	PMID:26096185	Pathogenic(Last reviewed: Dec 20, 2014)	2	166895985	2	166039475
NM_001165963.4(SCN1A):c.2479T>G (p.Tyr827Asp)	Severe myoclonic epilepsy in infancy	Dravet syndrome	PMID:26096185	Pathogenic(Last reviewed: Dec 20, 2014)	2	166896043	2	166039533
NM_001165963.4(SCN1A):c.2353A>G (p.Met785Val)	Early infantile epileptic encephalopathy with suppression bursts|Severe myoclonic epilepsy in infancy	Dravet syndrome	PMID:26096185	Pathogenic/Likely pathogenic(Last reviewed: Jan 7, 2020)	2	166897803	2	166041293
NM_001165963.4(SCN1A):c.2261G>T (p.Trp754Leu)	Severe myoclonic epilepsy in infancy	Dravet syndrome	PMID:26096185	Pathogenic(Last reviewed: Dec 20, 2014)	2	166897895	2	166041385
NM_001165963.4(SCN1A):c.2213G>T (p.Trp738Leu)	Severe myoclonic epilepsy in infancy	Dravet syndrome	PMID:26096185	Pathogenic(Last reviewed: Dec 20, 2014)	2	166897943	2	166041433
NM_001165963.4(SCN1A):c.1970C>T (p.Pro657Leu)	Severe myoclonic epilepsy in infancy	Dravet syndrome	PMID:26096185	Pathogenic(Last reviewed: Dec 20, 2014)	2	166900252	2	166043742
NM_001165963.4(SCN1A):c.1876A>G (p.Ser626Gly)	Generalized epilepsy|Severe myoclonic epilepsy in infancy	Dravet syndrome	PMID:26096185	Pathogenic(Last reviewed: Dec 20, 2014)	2	166900346	2	166043836
NM_001165963.4(SCN1A):c.1277A>G (p.Tyr426Cys)	not provided|Severe myoclonic epilepsy in infancy|Early infantile epileptic encephalopathy with suppression bursts	Dravet syndrome	PMID:18930999,23195492,30577886,31864146	Pathogenic/Likely pathogenic(Last reviewed: Dec 8, 2021)	2	166903380	2	166046870
NM_001165963.4(SCN1A):c.1265T>C (p.Val422Ala)	Severe myoclonic epilepsy in infancy	Dravet syndrome	PMID:26096185	Pathogenic(Last reviewed: Dec 20, 2014)	2	166903392	2	166046882
NM_001165963.4(SCN1A):c.1237T>A (p.Tyr413Asn)	Severe myoclonic epilepsy in infancy	Dravet syndrome	PMID:19589774	Pathogenic	2	166903420	2	166046910
NM_001165963.4(SCN1A):c.1199T>A (p.Met400Lys)	Severe myoclonic epilepsy in infancy	Dravet syndrome	PMID:26096185	Pathogenic(Last reviewed: Dec 20, 2014)	2	166903458	2	166046948
NM_001165963.4(SCN1A):c.1178G>A (p.Arg393His)	Early infantile epileptic encephalopathy with suppression bursts|Familial hemiplegic migraine type 3|Severe myoclonic epilepsy in infancy|not provided	Dravet syndrome	PMID:26096185	Pathogenic/Likely pathogenic(Last reviewed: Jan 6, 2021)	2	166903479	2	166046969
NM_001165963.4(SCN1A):c.1177C>A (p.Arg393Ser)	Early infantile epileptic encephalopathy with suppression bursts|Severe myoclonic epilepsy in infancy	severe myoclonic epilepsy in infancy	PMID:17054684	Pathogenic(Last reviewed: Apr 25, 2019)	2	166903480	2	166046970
NM_001165963.4(SCN1A):c.1146C>A (p.Asp382Glu)	Early infantile epileptic encephalopathy with suppression bursts|Severe myoclonic epilepsy in infancy	Dravet syndrome	PMID:26096185	Pathogenic/Likely pathogenic(Last reviewed: Aug 22, 2021)	2	166904161	2	166047651
NM_001165963.4(SCN1A):c.1136T>A (p.Met379Lys)	Severe myoclonic epilepsy in infancy	Dravet syndrome	PMID:26096185	Pathogenic(Last reviewed: Dec 20, 2014)	2	166904171	2	166047661
NM_001165963.4(SCN1A):c.1072C>T (p.Pro358Ser)	Severe myoclonic epilepsy in infancy	Dravet syndrome	PMID:26096185	Pathogenic(Last reviewed: Dec 20, 2014)	2	166904235	2	166047725
NM_001165963.4(SCN1A):c.1048A>G (p.Met350Val)	Severe myoclonic epilepsy in infancy	Dravet syndrome	PMID:26096185	Pathogenic(Last reviewed: Dec 20, 2014)	2	166904259	2	166047749
NM_001165963.4(SCN1A):c.1046A>G (p.Tyr349Cys)	Severe myoclonic epilepsy in infancy	Dravet syndrome	PMID:26096185	Pathogenic(Last reviewed: Dec 20, 2014)	2	166904261	2	166047751
NM_001165963.4(SCN1A):c.1025C>T (p.Ala342Val)	Severe myoclonic epilepsy in infancy	Dravet syndrome	PMID:26096185	Pathogenic(Last reviewed: Dec 20, 2014)	2	166905399	2	166048889
NM_001165963.4(SCN1A):c.1024G>T (p.Ala342Ser)	Severe myoclonic epilepsy in infancy	Dravet syndrome	PMID:26096185	Pathogenic(Last reviewed: Dec 20, 2014)	2	166905400	2	166048890
NM_001165963.4(SCN1A):c.1007G>A (p.Cys336Tyr)	Severe myoclonic epilepsy in infancy	Dravet syndrome	PMID:26096185	Pathogenic(Last reviewed: May 28, 2019)	2	166905417	2	166048907
NM_001165963.4(SCN1A):c.965G>T (p.Arg322Ile)	Early infantile epileptic encephalopathy with suppression bursts|Severe myoclonic epilepsy in infancy	Dravet syndrome	PMID:17561957,Â¬â€ 30146492	Likely pathogenic(Last reviewed: Dec 7, 2018)	2	166905459	2	166048949
NM_001165963.4(SCN1A):c.838T>C (p.Trp280Arg)	Severe myoclonic epilepsy in infancy	Dravet syndrome	PMID:26096185	Pathogenic(Last reviewed: Dec 20, 2014)	2	166908355	2	166051845
NM_001165963.4(SCN1A):c.826A>C (p.Lys276Gln)	Severe myoclonic epilepsy in infancy	Dravet syndrome	PMID:26096185	Pathogenic(Last reviewed: Dec 20, 2014)	2	166908367	2	166051857
NM_001165963.4(SCN1A):c.777C>A (p.Ser259Arg)	Severe myoclonic epilepsy in infancy|Seizure	Dravet syndrome	PMID:26096185	Pathogenic(Last reviewed: Dec 20, 2014)	2	166908416	2	166051906
NM_001165963.4(SCN1A):c.769T>C (p.Cys257Arg)	Severe myoclonic epilepsy in infancy|not provided	Dravet syndrome	PMID:26096185	Pathogenic/Likely pathogenic(Last reviewed: Aug 21, 2018)	2	166908424	2	166051914
NM_001165963.4(SCN1A):c.747T>G (p.Asp249Glu)	Severe myoclonic epilepsy in infancy	Dravet syndrome	PMID:26096185	Pathogenic(Last reviewed: Dec 20, 2014)	2	166908446	2	166051936
NM_001165963.4(SCN1A):c.728C>A (p.Ser243Tyr)	Severe myoclonic epilepsy in infancy	Dravet syndrome	PMID:26096185	Pathogenic(Last reviewed: Dec 20, 2014)	2	166908465	2	166051955
NM_001165963.4(SCN1A):c.715G>A (p.Ala239Thr)	Severe myoclonic epilepsy in infancy	Dravet syndrome	PMID:26096185	Pathogenic(Last reviewed: Dec 20, 2014)	2	166908478	2	166051968
NM_001165963.4(SCN1A):c.580G>A (p.Asp194Asn)	Early infantile epileptic encephalopathy with suppression bursts|not provided|Severe myoclonic epilepsy in infancy	severe myoclonic epilepsy of infancy,Dravet syndrome	PMID:17054684,19589774,23662938	Pathogenic(Last reviewed: May 28, 2019)	2	166911170	2	166054660
NM_001165963.4(SCN1A):c.568T>C (p.Trp190Arg)	Severe myoclonic epilepsy in infancy|Early infantile epileptic encephalopathy with suppression bursts	severe myoclonic epilepsy in infancy,Dravet Syndrome	PMID:14738421,30868114,26096185	Pathogenic(Last reviewed: Oct 23, 2021)	2	166911182	2	166054672
NM_001165963.4(SCN1A):c.530G>T (p.Gly177Val)	Severe myoclonic epilepsy in infancy	Dravet syndrome	PMID:26096185	Pathogenic(Last reviewed: Dec 20, 2014)	2	166911220	2	166054710
NM_001165963.4(SCN1A):c.530G>A (p.Gly177Glu)	Early infantile epileptic encephalopathy with suppression bursts|Severe myoclonic epilepsy in infancy	severe myoclonic epilepsy of infancy or Dravet syndrome	PMID:12821740,27236449	Pathogenic(Last reviewed: Nov 13, 2019)	2	166911220	2	166054710
NM_001165963.4(SCN1A):c.523G>A (p.Ala175Thr)	Severe myoclonic epilepsy in infancy|Early infantile epileptic encephalopathy with suppression bursts	Dravet syndrome	PMID:17347258,19589774	Pathogenic(Last reviewed: Dec 24, 2019)	2	166911227	2	166054717
NM_001165963.4(SCN1A):c.485C>T (p.Thr162Ile)	Early infantile epileptic encephalopathy with suppression bursts|Severe myoclonic epilepsy in infancy	Dravet syndrome	PMID:28202706	Pathogenic/Likely pathogenic(Last reviewed: Jul 31, 2021)	2	166911265	2	166054755
NM_001165963.4(SCN1A):c.433A>G (p.Met145Val)	Severe myoclonic epilepsy in infancy	Dravet syndrome	PMID:26096185	Pathogenic(Last reviewed: Dec 20, 2014)	2	166912961	2	166056451
NM_001165963.4(SCN1A):c.380A>T (p.His127Leu)	Severe myoclonic epilepsy in infancy	Dravet syndrome	PMID:26096185	Pathogenic(Last reviewed: Dec 20, 2014)	2	166915083	2	166058573
NM_001165963.4(SCN1A):c.337C>A (p.Pro113Thr)	Early infantile epileptic encephalopathy with suppression bursts|not provided|Severe myoclonic epilepsy in infancy	Dravet syndrome and epileptic encephalopathy	PMID:26096185,25818041	Pathogenic(Last reviewed: Jun 21, 2019)	2	166915126	2	166058616
NM_001165963.4(SCN1A):c.335C>T (p.Thr112Ile)	Severe myoclonic epilepsy in infancy|not provided|Early infantile epileptic encephalopathy with suppression bursts	Severe myoclonic epilepsy in infancy	PMID:12566275	Likely pathogenic(Last reviewed: Aug 28, 2021)	2	166915128	2	166058618
NM_001165963.4(SCN1A):c.323T>C (p.Leu108Pro)	Severe myoclonic epilepsy in infancy	Dravet syndrome	PMID:26096185	Pathogenic(Last reviewed: Dec 20, 2014)	2	166915140	2	166058630
NM_001165963.4(SCN1A):c.308G>T (p.Ser103Ile)	Severe myoclonic epilepsy in infancy	Dravet syndrome	PMID:26096185	Pathogenic(Last reviewed: Dec 20, 2014)	2	166915155	2	166058645
NM_001165963.4(SCN1A):c.302G>A (p.Arg101Gln)	Familial hemiplegic migraine type 3|Early infantile epileptic encephalopathy with suppression bursts|not provided|Severe myoclonic epilepsy in infancy	Dravet syndrome	PMID:24328833,23808377,23195492	Pathogenic(Last reviewed: Mar 17, 2021)	2	166915161	2	166058651
NM_001165963.4(SCN1A):c.301C>T (p.Arg101Trp)	Early infantile epileptic encephalopathy with suppression bursts|Familial hemiplegic migraine type 3|not provided|Severe myoclonic epilepsy in infancy	severe myoclonic epilepsy of infancy (SMEI) and Dravet Syndrome	PMID:17347258,27236449,20431604,24168886,27113213	Pathogenic/Likely pathogenic(Last reviewed: Oct 28, 2020)	2	166915162	2	166058652
NM_001165963.4(SCN1A):c.269T>C (p.Phe90Ser)	Severe myoclonic epilepsy in infancy|not provided	Dravet syndrome	PMID:26096185	Pathogenic/Likely pathogenic(Last reviewed: Jul 15, 2015)	2	166915194	2	166058684
NM_001165963.4(SCN1A):c.251A>G (p.Tyr84Cys)	Early infantile epileptic encephalopathy with suppression bursts|Generalized epilepsy with febrile seizures plus, type 2|Severe myoclonic epilepsy in infancy|Familial hemiplegic migraine type 3|not provided|Severe myoclonic epilepsy in infancy	severe myoclonic epilepsy of infancy (SMEI) or Dravet syndrome	PMID:17347258,23195492,22050978	Pathogenic/Likely pathogenic(Last reviewed: May 26, 2021)	2	166929881	2	166073371
NM_001165963.4(SCN1A):c.70G>A (p.Ala24Thr)	Severe myoclonic epilepsy in infancy	Dravet syndrome	PMID:26096185	Pathogenic(Last reviewed: Dec 20, 2014)	2	166930062	2	166073552
NM_001165963.4(SCN1A):c.5734C>T (p.Arg1912Ter)	Early infantile epileptic encephalopathy with suppression bursts|not provided|Autosomal dominant epilepsy	Dravet syndrome	PMID:14738421,23195492	Pathogenic(Last reviewed: Oct 28, 2020)	2	166848051	2	165991541
NM_001165963.4(SCN1A):c.5674C>T (p.Arg1892Ter)	Severe myoclonic epilepsy in infancy|not provided|Generalized epilepsy with febrile seizures plus, type 2|Early infantile epileptic encephalopathy with suppression bursts	severe myoclonic epilepsy of infancy (SMEI)	PMID:17054684,11940708,19563349	Pathogenic(Last reviewed: Sep 30, 2019)	2	166848111	2	165991601
NM_001165963.4(SCN1A):c.5662C>T (p.Gln1888Ter)	Severe myoclonic epilepsy in infancy	Dravet syndrome	PMID:26096185	Pathogenic(Last reviewed: Dec 20, 2014)	2	166848123	2	165991613
NM_001165963.4(SCN1A):c.5656C>T (p.Arg1886Ter)	Early infantile epileptic encephalopathy with suppression bursts|not provided|Severe myoclonic epilepsy in infancy	severe myoclonic epilepsy of infancy (SMEI) or Dravet syndrome	PMID:17054684,18930999,22409937,17347258	Pathogenic(Last reviewed: Jan 3, 2020)	2	166848129	2	165991619
NM_001165963.4(SCN1A):c.5536A>T (p.Lys1846Ter)	Severe myoclonic epilepsy in infancy	Dravet syndrome	PMID:26096185	Pathogenic(Last reviewed: Dec 20, 2014)	2	166848249	2	165991739
NM_001165963.4(SCN1A):c.5470G>T (p.Glu1824Ter)	Severe myoclonic epilepsy in infancy	Dravet syndrome	PMID:26096185	Pathogenic(Last reviewed: Dec 20, 2014)	2	166848315	2	165991805
NM_001165963.4(SCN1A):c.5461C>T (p.Gln1821Ter)	Severe myoclonic epilepsy in infancy	Dravet syndrome	PMID:26096185	Pathogenic(Last reviewed: Dec 20, 2014)	2	166848324	2	165991814
NM_001165963.4(SCN1A):c.5404G>T (p.Glu1802Ter)	Severe myoclonic epilepsy in infancy	Dravet syndrome	PMID:26096185	Pathogenic(Last reviewed: Dec 20, 2014)	2	166848381	2	165991871
NM_001165963.4(SCN1A):c.5082T>G (p.Tyr1694Ter)	Severe myoclonic epilepsy in infancy	Dravet syndrome	PMID:26096185	Pathogenic(Last reviewed: Dec 20, 2014)	2	166848703	2	165992193
NM_001165963.4(SCN1A):c.4811G>A (p.Trp1604Ter)	Severe myoclonic epilepsy in infancy	Dravet syndrome	PMID:26096185	Pathogenic(Last reviewed: Dec 20, 2014)	2	166850697	2	165994187
NM_001165963.4(SCN1A):c.4549A>T (p.Lys1517Ter)	Severe myoclonic epilepsy in infancy|not provided	Dravet syndrome	PMID:26096185	Pathogenic(Last reviewed: Aug 23, 2016)	2	166852555	2	165996045
NM_001165963.4(SCN1A):c.4302G>A (p.Trp1434Ter)	Severe myoclonic epilepsy in infancy	Dravet syndrome	PMID:26096185	Pathogenic(Last reviewed: Dec 20, 2014)	2	166856269	2	165999759
NM_001165963.4(SCN1A):c.4301G>A (p.Trp1434Ter)	History of neurodevelopmental disorder	severe myoclonic epilepsy of infancy (SMEI) and Dravet syndrome	PMID:26096185,18413471	Pathogenic(Last reviewed: Feb 14, 2018)	2	166856270	2	165999760
NM_001165963.4(SCN1A):c.4284+1G>A	Severe myoclonic epilepsy in infancy	Dravet syndrome	PMID:21248271	Pathogenic(Last reviewed: Oct 7, 2021)	2	166858981	2	166002471
NM_001165963.4(SCN1A):c.4223G>A (p.Trp1408Ter)	Severe myoclonic epilepsy in infancy|Generalized epilepsy with febrile seizures plus, type 2	Dravet Syndrome	PMID:26096185	Pathogenic(Last reviewed: Dec 20, 2014)	2	166859043	2	166002533
NM_001165963.4(SCN1A):c.4219C>T (p.Arg1407Ter)	not provided|Severe myoclonic epilepsy in infancy|Early infantile epileptic encephalopathy with suppression bursts|History of neurodevelopmental disorder	Dravet syndrome	PMID:24502503	Pathogenic(Last reviewed: Nov 27, 2020)	2	166859047	2	166002537
NM_001165963.4(SCN1A):c.4188C>A (p.Cys1396Ter)	Severe myoclonic epilepsy in infancy	Dravet Syndrome	PMID:26096185	Pathogenic(Last reviewed: Dec 20, 2014)	2	166859078	2	166002568
NM_001165963.4(SCN1A):c.3880-2A>G	Early infantile epileptic encephalopathy with suppression bursts|Severe myoclonic epilepsy in infancy	Dravet Syndrome	PMID:26096185	Pathogenic(Last reviewed: May 8, 2018)	2	166866353	2	166009843
NM_001165963.4(SCN1A):c.3879+1G>T	Severe myoclonic epilepsy in infancy	Dravet Syndrome	PMID:26096185	Pathogenic(Last reviewed: Dec 20, 2014)	2	166868618	2	166012108
NM_001165963.4(SCN1A):c.3858G>A (p.Trp1286Ter)	Severe myoclonic epilepsy in infancy	Dravet Syndrome	PMID:26096185	Pathogenic(Last reviewed: Dec 20, 2014)	2	166868640	2	166012130
NM_001165963.4(SCN1A):c.3828T>A (p.Tyr1276Ter)	Severe myoclonic epilepsy in infancy	Dravet Syndrome	PMID:26096185	Pathogenic(Last reviewed: Dec 20, 2014)	2	166868670	2	166012160
NM_001165963.4(SCN1A):c.3757G>T (p.Glu1253Ter)	Severe myoclonic epilepsy in infancy	Dravet Syndrome	PMID:26096185	Pathogenic(Last reviewed: Dec 20, 2014)	2	166868741	2	166012231
NM_001165963.4(SCN1A):c.3733C>T (p.Arg1245Ter)	Early infantile epileptic encephalopathy with suppression bursts|not provided|Severe myoclonic epilepsy in infancy|History of neurodevelopmental disorder	severe myoclonic epilepsy of infancy (SMEI) or Dravet syndrome	PMID:12821740,21906962,26096185	Pathogenic(Last reviewed: Sep 1, 2021)	2	166868765	2	166012255
NM_001165963.4(SCN1A):c.3730C>T (p.Gln1244Ter)	Severe myoclonic epilepsy in infancy	Dravet Syndrome	PMID:26096185	Pathogenic(Last reviewed: Dec 20, 2014)	2	166868768	2	166012258
NM_001165963.4(SCN1A):c.3705+2T>A	Severe myoclonic epilepsy in infancy	Dravet Syndrome	PMID:26096185	Pathogenic(Last reviewed: Dec 20, 2014)	2	166870252	2	166013742
NM_001165963.4(SCN1A):c.3615G>A (p.Trp1205Ter)	Severe myoclonic epilepsy in infancy|History of neurodevelopmental disorder|Inborn genetic diseases	Dravet Syndrome	PMID:26096185,24168886	Pathogenic(Last reviewed: Jul 27, 2016)	2	166870344	2	166013834
NM_001165963.4(SCN1A):c.3612G>A (p.Trp1204Ter)	Early infantile epileptic encephalopathy with suppression bursts|Severe myoclonic epilepsy in infancy	Dravet syndrome	PMID:11940708	Pathogenic(Last reviewed: Apr 25, 2021)	2	166870347	2	166013837
NM_001165963.4(SCN1A):c.3611G>A (p.Trp1204Ter)	Severe myoclonic epilepsy in infancy|Early infantile epileptic encephalopathy with suppression bursts	severe myoclonicepilepsy in infancy (SMEI)	PMID:11940708	Pathogenic(Last reviewed: May 28, 2019)	2	166870348	2	166013838
NM_001165963.4(SCN1A):c.3550+1G>A	Severe myoclonic epilepsy in infancy	Dravet Syndrome	PMID:26096185	Pathogenic(Last reviewed: Dec 20, 2014)	2	166872116	2	166015606
NM_001165963.4(SCN1A):c.3496C>T (p.Gln1166Ter)	Early infantile epileptic encephalopathy with suppression bursts|Severe myoclonic epilepsy in infancy|not provided	Dravet syndrome	PMID:28012175	Pathogenic(Last reviewed: Jul 20, 2021)	2	166872171	2	166015661
NM_001165963.4(SCN1A):c.3455C>A (p.Ser1152Ter)	Severe myoclonic epilepsy in infancy	Dravet Syndrome	PMID:26096185	Pathogenic(Last reviewed: Dec 20, 2014)	2	166872212	2	166015702
NM_001165963.4(SCN1A):c.3439G>T (p.Glu1147Ter)	Severe myoclonic epilepsy in infancy	Dravet Syndrome	PMID:26096185	Pathogenic(Last reviewed: Dec 20, 2014)	2	166872228	2	166015718
NM_001165963.4(SCN1A):c.3106C>T (p.Gln1036Ter)	Severe myoclonic epilepsy in infancy|Early infantile epileptic encephalopathy with suppression bursts	Dravet syndrome	PMID:21868258	Pathogenic(Last reviewed: Sep 5, 2017)	2	166892881	2	166036371
NM_001165963.4(SCN1A):c.2946+1G>T	Early infantile epileptic encephalopathy with suppression bursts|Severe myoclonic epilepsy in infancy|not provided	Dravet Syndrome	PMID:26096185,17347258	Pathogenic(Last reviewed: Oct 27, 2021)	2	166894285	2	166037775
NM_001165963.4(SCN1A):c.2584C>T (p.Arg862Ter)	Early infantile epileptic encephalopathy with suppression bursts|Severe myoclonic epilepsy in infancy|not provided	Dravet Syndrome	PMID:26096185	Pathogenic(Last reviewed: Sep 8, 2021)	2	166895938	2	166039428
NM_001165963.4(SCN1A):c.2244G>A (p.Trp748Ter)	not provided|Early infantile epileptic encephalopathy with suppression bursts	severe myoclonic epilepsy of infancy	PMID:23195492	Pathogenic(Last reviewed: Nov 1, 2021)	2	166897912	2	166041402
NM_001165963.4(SCN1A):c.2214G>A (p.Trp738Ter)	not provided|Generalized epilepsy with febrile seizures plus, type 2	Dravet syndrome	PMID:22848613	Pathogenic(Last reviewed: Feb 1, 2017)	2	166897942	2	166041432
NM_001165963.4(SCN1A):c.2213G>A (p.Trp738Ter)	Severe myoclonic epilepsy in infancy|not provided	Dravet Syndrome	PMID:26096185	Pathogenic(Last reviewed: Jan 11, 2018)	2	166897943	2	166041433
NM_001165963.4(SCN1A):c.2134C>T (p.Arg712Ter)	Autosomal dominant epilepsy|Generalized epilepsy with febrile seizures plus, type 2|Epileptic encephalopathy, early infantile, 1|Severe myoclonic epilepsy in infancy|Early infantile epileptic encephalopathy with suppression bursts|not provided	Dravet syndrome	PMID:11940708,23808377,23195492,26533041	Pathogenic(Last reviewed: Jan 14, 2022)	2	166898844	2	166042334
NM_001165963.4(SCN1A):c.2071A>T (p.Lys691Ter)	Severe myoclonic epilepsy in infancy	Dravet Syndrome	PMID:26096185	Pathogenic(Last reviewed: Dec 20, 2014)	2	166898907	2	166042397
NM_001165963.4(SCN1A):c.1837C>T (p.Arg613Ter)	Severe myoclonic epilepsy in infancy|Familial hemiplegic migraine type 3|Severe myoclonic epilepsy in infancy|Generalized epilepsy with febrile seizures plus, type 2|Early infantile epileptic encephalopathy with suppression bursts|not provided	Dravet syndrome	PMID:16458823,17054684,1893099	Pathogenic(Last reviewed: May 28, 2019)	2	166900385	2	166043875
NM_001165963.4(SCN1A):c.1834C>T (p.Arg612Ter)	Early infantile epileptic encephalopathy with suppression bursts|Severe myoclonic epilepsy in infancy	severe myoclonic epilepsy of infancy	PMID:18554359	Pathogenic(Last reviewed: Apr 25, 2021)	2	166900388	2	166043878
NM_001165963.4(SCN1A):c.1804G>T (p.Glu602Ter)	Severe myoclonic epilepsy in infancy	Dravet Syndrome	PMID:26096185	Pathogenic(Last reviewed: Dec 20, 2014)	2	166900418	2	166043908
NM_001165963.4(SCN1A):c.1738C>T (p.Arg580Ter)	Early infantile epileptic encephalopathy with suppression bursts|not provided|Severe myoclonic epilepsy in infancy	Dravet syndrome	PMID:18930999,20522430,20110217,25206388,24502503	Pathogenic(Last reviewed: Jun 19, 2017)	2	166900484	2	166043974
NM_001165963.4(SCN1A):c.1662+1G>A	not provided|Early infantile epileptic encephalopathy with suppression bursts	severe myoclonic epilepsy of infancy	PMID:17054684	Pathogenic(Last reviewed: Mar 20, 2019)	2	166901552	2	166045042
NM_001165963.4(SCN1A):c.1662+1G>T	Severe myoclonic epilepsy in infancy	Dravet Syndrome	PMID:26096185	Pathogenic(Last reviewed: Dec 20, 2014)	2	166901552	2	166045042
NM_001165963.4(SCN1A):c.1516C>T (p.Gln506Ter)	Early infantile epileptic encephalopathy with suppression bursts|Severe myoclonic epilepsy in infancy	Dravet Syndrome	PMID:26096185	Pathogenic(Last reviewed: Apr 2, 2021)	2	166901699	2	166045189
NM_001165963.4(SCN1A):c.1345G>T (p.Glu449Ter)	Severe myoclonic epilepsy in infancy	Dravet Syndrome	PMID:26096185	Pathogenic(Last reviewed: Dec 20, 2014)	2	166903312	2	166046802
NM_001165963.4(SCN1A):c.1170+1G>T	Severe myoclonic epilepsy in infancy|not provided	Dravet Syndrome	PMID:26096185	Pathogenic(Last reviewed: Aug 17, 2017)	2	166904136	2	166047626
NM_001165963.4(SCN1A):c.1129C>T (p.Arg377Ter)	Early infantile epileptic encephalopathy with suppression bursts|Severe myoclonic epilepsy in infancy|not provided	Dravet syndrome	PMID:27465585,17054684,23808377	Pathogenic(Last reviewed: Jul 7, 2020)	2	166904178	2	166047668
NM_001165963.4(SCN1A):c.1028+1G>T	Severe myoclonic epilepsy in infancy|Early infantile epileptic encephalopathy with suppression bursts	severe myoclonic epilepsy of infancy	PMID:17347258	Pathogenic(Last reviewed: Oct 6, 2019)	2	166905395	2	166048885
NM_001165963.4(SCN1A):c.965-1G>A	Early infantile epileptic encephalopathy with suppression bursts|Severe myoclonic epilepsy in infancy|not provided	Dravet Syndrome	PMID:26096185	Pathogenic/Likely pathogenic(Last reviewed: Oct 20, 2020)	2	166905460	2	166048950
NM_001165963.4(SCN1A):c.664C>T (p.Arg222Ter)	Early infantile epileptic encephalopathy with suppression bursts|Severe myoclonic epilepsy in infancy|Severe myoclonic epilepsy in infancy|Generalized epilepsy with febrile seizures plus, type 2|Familial hemiplegic migraine type 3|Intellectual disability|History of neurodevelopmental disorder|not provided	Dravet Syndrome	PMID11359211,23195492,29100083,26096185	Pathogenic/Likely pathogenic(Last reviewed: Jan 3, 2022)	2	166909392	2	166052882
NM_001165963.4(SCN1A):c.602+1G>T	Early infantile epileptic encephalopathy with suppression bursts|Severe myoclonic epilepsy in infancy	Dravet syndrome	PMID:18930999	Pathogenic(Last reviewed: Jun 23, 2021)	2	166911147	2	166054637
NM_001165963.4(SCN1A):c.539T>A (p.Leu180Ter)	Severe myoclonic epilepsy in infancy|Early infantile epileptic encephalopathy with suppression bursts	Dravet syndrome	PMID:28202706	Pathogenic(Last reviewed: Sep 1, 2020)	2	166911211	2	166054701
NM_001165963.4(SCN1A):c.473+1G>C	Severe myoclonic epilepsy in infancy	Dravet Syndrome	PMID:26096185	Pathogenic(Last reviewed: Dec 20, 2014)	2	166912920	2	166056410
NM_001165963.4(SCN1A):c.384-1C>G	Severe myoclonic epilepsy in infancy	Dravet Syndrome	PMID:26096185	Pathogenic(Last reviewed: Dec 20, 2014)	2	166913011	2	166056501
NM_001165963.4(SCN1A):c.121A>T (p.Lys41Ter)	Severe myoclonic epilepsy in infancy	Dravet Syndrome	PMID:26096185	Pathogenic(Last reviewed: Dec 20, 2014)	2	166930011	2	166073501
NM_001165963.4(SCN1A):c.5349_5352dup (p.Ile1785fs)	Severe myoclonic epilepsy in infancy	Dravet Syndrome	PMID:26096185	Pathogenic(Last reviewed: Dec 20, 2014)	2	166848432 - 166848433	2	165991922 - 165991923
NM_001165963.4(SCN1A):c.5334del (p.Asn1779fs)	Severe myoclonic epilepsy in infancy	Dravet Syndrome	PMID:26096185	Pathogenic(Last reviewed: Dec 20, 2014)	2	166848451	2	165991941
NM_001165963.4(SCN1A):c.5297_5298del (p.Phe1766fs)	Severe myoclonic epilepsy in infancy	Dravet Syndrome	PMID:26096185	Pathogenic(Last reviewed: Dec 20, 2014)	2	166848487 - 166848488	2	165991977 - 165991978
NM_001165963.4(SCN1A):c.5284_5291dup (p.Phe1764fs)	Severe myoclonic epilepsy in infancy	Dravet Syndrome	PMID:26096185	Pathogenic(Last reviewed: Dec 20, 2014)	2	166848493 - 166848494	2	165991983 - 165991984
NM_001165963.4(SCN1A):c.5250_5251insGG (p.Ser1751fs)	Severe myoclonic epilepsy in infancy	Dravet Syndrome	PMID:26096185	Pathogenic(Last reviewed: Dec 20, 2014)	2	166848534 - 166848535	2	165992024 - 165992025
NM_001165963.4(SCN1A):c.5010_5013del (p.Phe1671fs)	Severe myoclonic epilepsy in infancy|not provided|Early infantile epileptic encephalopathy with suppression bursts|Epileptic encephalopathy	Dravet syndrome and early infantile epileptic encephalopathy	PMID:11359211,26993267	Pathogenic(Last reviewed: Nov 19, 2021)	2	166848772 - 166848775	2	165992262 - 165992265
NM_001165963.4(SCN1A):c.5003del (p.Pro1668fs)	Severe myoclonic epilepsy in infancy	Dravet Syndrome	PMID:26096185	Pathogenic(Last reviewed: Dec 20, 2014)	2	166848782	2	165992272
NM_001165963.4(SCN1A):c.4993_4996dup (p.Ser1666fs)	Severe myoclonic epilepsy in infancy	Dravet Syndrome	PMID:26096185	Pathogenic(Last reviewed: Dec 20, 2014)	2	166848788 - 166848789	2	165992278 - 165992279
NM_001165963.4(SCN1A):c.4879_4883dup (p.Tyr1628Ter)	Severe myoclonic epilepsy in infancy	Dravet Syndrome	PMID:26096185	Pathogenic(Last reviewed: Dec 20, 2014)	2	166848901 - 166848902	2	165992391 - 165992392
NM_001165963.4(SCN1A):c.4823del (p.Asp1608fs)	Severe myoclonic epilepsy in infancy	Dravet Syndrome	PMID:26096185	Pathogenic(Last reviewed: Dec 20, 2014)	2	166850685	2	165994175
NM_001165963.4(SCN1A):c.4611_4645dup (p.Ile1549delinsThrTer)	Severe myoclonic epilepsy in infancy	Dravet Syndrome	PMID:26096185	Pathogenic(Last reviewed: Dec 20, 2014)	2	166850862 - 166850863	2	165994352 - 165994353
NM_001165963.4(SCN1A):c.4554del (p.Lys1518fs)	Severe myoclonic epilepsy in infancy|Early infantile epileptic encephalopathy with suppression bursts	Dravet syndrome	PMID:18930999,26096185	Pathogenic(Last reviewed: May 20, 2019)	2	166852550	2	165996040
NM_001165963.4(SCN1A):c.4244_4245del (p.Asn1414_Phe1415insTer)	Severe myoclonic epilepsy in infancy	Dravet Syndrome	PMID:26096185	Pathogenic(Last reviewed: Dec 20, 2014)	2	166859021 - 166859022	2	166002511 - 166002512
NM_001165963.4(SCN1A):c.3852del (p.Trp1284fs)	Severe myoclonic epilepsy in infancy	Dravet syndrome	PMID:22071555	Pathogenic(Last reviewed: Aug 16, 2012)	2	166868646	2	166012136
NM_001165963.4(SCN1A):c.3802_3812del (p.Leu1268fs)	Severe myoclonic epilepsy in infancy	Dravet Syndrome	PMID:26096185	Pathogenic(Last reviewed: Dec 20, 2014)	2	166868686 - 166868696	2	166012176 - 166012186
NM_001165963.4(SCN1A):c.3726_3727insAT (p.Asp1243fs)	Severe myoclonic epilepsy in infancy	Dravet Syndrome	PMID:26096185	Pathogenic(Last reviewed: Dec 20, 2014)	2	166868771 - 166868772	2	166012261 - 166012262
NM_001165963.4(SCN1A):c.3609del (p.Gln1203fs)	Severe myoclonic epilepsy in infancy	severe myoclonic epilepsy of infancy	PMID:18680191	Pathogenic(Last reviewed: Sep 15, 2008)	2	166870350	2	166013840
NM_001165963.4(SCN1A):c.3487del (p.Pro1162_Val1163insTer)	Severe myoclonic epilepsy in infancy	Dravet Syndrome	PMID:26096185	Pathogenic(Last reviewed: Dec 20, 2014)	2	166872180	2	166015670
NM_001165963.4(SCN1A):c.3477del (p.Ile1159fs)	Severe myoclonic epilepsy in infancy	Dravet Syndrome	PMID:26096185	Pathogenic(Last reviewed: Dec 20, 2014)	2	166872190	2	166015680
NM_001165963.4(SCN1A):c.3062_3066del (p.Lys1021fs)	Severe myoclonic epilepsy in infancy	Dravet Syndrome	PMID:26096185	Pathogenic(Last reviewed: Dec 20, 2014)	2	166892921 - 166892925	2	166036411 - 166036415
NM_001165963.4(SCN1A):c.3017del (p.Asp1006fs)	Severe myoclonic epilepsy in infancy	Dravet Syndrome	PMID:26096185	Pathogenic(Last reviewed: Dec 20, 2014)	2	166892970	2	166036460
NM_001165963.4(SCN1A):c.2980_2981del (p.Ser994fs)	Severe myoclonic epilepsy in infancy	Dravet Syndrome	PMID:26096185	Pathogenic(Last reviewed: Dec 20, 2014)	2	166893006 - 166893007	2	166036496 - 166036497
NM_001165963.4(SCN1A):c.2947del	not provided|Severe myoclonic epilepsy in infancy	Dravet Syndrome	PMID:26096185	Pathogenic(Last reviewed: Apr 12, 2018)	2	166893040	2	166036530
NM_001165963.4(SCN1A):c.2946+1_2946+2del	Severe myoclonic epilepsy in infancy	Dravet Syndrome	PMID:26096185	Pathogenic(Last reviewed: Dec 20, 2014)	2	166894284 - 166894285	2	166037774 - 166037775
NM_001165963.4(SCN1A):c.2872_2881del (p.Asp958fs)	Severe myoclonic epilepsy in infancy	Dravet Syndrome	PMID:26096185	Pathogenic(Last reviewed: Dec 20, 2014)	2	166894351 - 166894360	2	166037841 - 166037850
NM_001165963.4(SCN1A):c.2603del (p.Lys868fs)	Severe myoclonic epilepsy in infancy	Dravet Syndrome	PMID:26096185	Pathogenic(Last reviewed: Dec 20, 2014)	2	166894629	2	166038119
NM_001165963.4(SCN1A):c.2523_2524del (p.Thr841_Leu842insTer)	Severe myoclonic epilepsy in infancy	Dravet Syndrome	PMID:26096185	Pathogenic(Last reviewed: Dec 20, 2014)	2	166895998 - 166895999	2	166039488 - 166039489
NM_001165963.4(SCN1A):c.2318_2319insT (p.Ile774fs)	Severe myoclonic epilepsy in infancy	Dravet Syndrome	PMID:26096185	Pathogenic(Last reviewed: Dec 20, 2014)	2	166897837 - 166897838	2	166041327 - 166041328
NM_001165963.4(SCN1A):c.2299_2302dup (p.Pro768fs)	Severe myoclonic epilepsy in infancy	Dravet Syndrome	PMID:26096185	Pathogenic(Last reviewed: Dec 20, 2014)	2	166897853 - 166897854	2	166041343 - 166041344
NM_001165963.4(SCN1A):c.2100del (p.Met701fs)	Severe myoclonic epilepsy in infancy	Dravet Syndrome	PMID:26096185	Pathogenic(Last reviewed: Dec 20, 2014)	2	166898878	2	166042368
NM_001165963.4(SCN1A):c.1667del (p.Leu556fs)	Severe myoclonic epilepsy in infancy	Dravet Syndrome	PMID:26096185	Pathogenic(Last reviewed: Dec 20, 2014)	2	166900555	2	166044045
NM_001165963.4(SCN1A):c.1660dup (p.Gln554fs)	Severe myoclonic epilepsy in infancy	Dravet Syndrome	PMID:26096185	Pathogenic(Last reviewed: Dec 20, 2014)	2	166901554 - 166901555	2	166045044 - 166045045
NM_001165963.4(SCN1A):c.1442_1445del (p.Asp481fs)	Severe myoclonic epilepsy in infancy	Dravet Syndrome	PMID:26096185	Pathogenic(Last reviewed: Dec 20, 2014)	2	166901770 - 166901773	2	166045260 - 166045263
NM_001165963.4(SCN1A):c.1301del (p.Leu434fs)	Severe myoclonic epilepsy in infancy	Dravet Syndrome	PMID:26096185	Pathogenic(Last reviewed: Dec 20, 2014)	2	166903356	2	166046846
NM_001165963.4(SCN1A):c.1197_1198del (p.Met400fs)	Severe myoclonic epilepsy in infancy	Dravet Syndrome	PMID:26096185	Pathogenic(Last reviewed: Dec 20, 2014)	2	166903459 - 166903460	2	166046949 - 166046950
NM_001165963.4(SCN1A):c.1183_1184del (p.Ala395fs)	Severe myoclonic epilepsy in infancy	Dravet Syndrome	PMID:26096185	Pathogenic(Last reviewed: Dec 20, 2014)	2	166903473 - 166903474	2	166046963 - 166046964
NM_001165963.4(SCN1A):c.1182_1183insA (p.Ala395fs)	Severe myoclonic epilepsy in infancy	Dravet Syndrome	PMID:26096185	Pathogenic(Last reviewed: Dec 20, 2014)	2	166903474 - 166903475	2	166046964 - 166046965
NM_001165963.4(SCN1A):c.1118del (p.Leu373fs)	Severe myoclonic epilepsy in infancy	Dravet Syndrome	PMID:26096185	Pathogenic(Last reviewed: Dec 20, 2014)	2	166904189	2	166047679
NM_001165963.4(SCN1A):c.1096_1115del (p.Asp366fs)	Severe myoclonic epilepsy in infancy	Dravet Syndrome	PMID:26096185	Pathogenic(Last reviewed: Dec 20, 2014)	2	166904192 - 166904211	2	166047682 - 166047701
NM_001165963.4(SCN1A):c.992dup (p.Leu331fs)	Severe myoclonic epilepsy in infancy	severe myoclonic epilepsy of infancy (SMEI)	PMID:17054684	Pathogenic(Last reviewed: Jul 13, 2015)	2	166905431 - 166905432	2	166048921 - 166048922
NM_001165963.4(SCN1A):c.930_931dup (p.Glu311fs)	Severe myoclonic epilepsy in infancy	Dravet Syndrome	PMID:26096185	Pathogenic(Last reviewed: Dec 20, 2014)	2	166908261 - 166908262	2	166051751 - 166051752
NM_001165963.4(SCN1A):c.896_905del (p.Asn299fs)	Severe myoclonic epilepsy in infancy	Dravet Syndrome	PMID:26096185	Pathogenic(Last reviewed: Dec 20, 2014)	2	166908288 - 166908297	2	166051778 - 166051787
NM_001165963.4(SCN1A):c.825_826insGTATA (p.Lys276delinsValTer)	Severe myoclonic epilepsy in infancy	Dravet Syndrome	PMID:26096185	Pathogenic(Last reviewed: Dec 20, 2014)	2	166908367 - 166908368	2	166051857 - 166051858
NM_001165963.4(SCN1A):c.751del (p.Val250_Met251insTer)	Severe myoclonic epilepsy in infancy	Dravet Syndrome	PMID:26096185	Pathogenic(Last reviewed: Dec 20, 2014)	2	166908442	2	166051932
NM_001165963.4(SCN1A):c.659_662del (p.Val220fs)	Severe myoclonic epilepsy in infancy	Dravet Syndrome	PMID:26096185	Pathogenic(Last reviewed: Dec 20, 2014)	2	166909394 - 166909397	2	166052884 - 166052887
NM_001165963.4(SCN1A):c.289_292del (p.Lys97fs)	Severe myoclonic epilepsy in infancy	Dravet Syndrome	PMID:26096185	Pathogenic(Last reviewed: Dec 20, 2014)	2	166915171 - 166915174	2	166058661 - 166058664
NM_001165963.4(SCN1A):c.185del (p.Pro62fs)	Severe myoclonic epilepsy in infancy	Dravet Syndrome	PMID:26096185	Pathogenic(Last reviewed: Dec 20, 2014)	2	166929947	2	166073437
NM_001165963.4(SCN1A):c.2835C>G (p.Phe945Leu)	Early infantile epileptic encephalopathy with suppression bursts|Generalized epilepsy with febrile seizures plus, type 2	Dravet syndrome	PMID:30558019	Pathogenic/Likely pathogenic(Last reviewed: Jan 3, 2022)	2	166894397	2	166037887
NM_001165963.4(SCN1A):c.1130G>A (p.Arg377Gln)	Early infantile epileptic encephalopathy with suppression bursts|not provided|Severe myoclonic epilepsy in infancy|Generalized epilepsy with febrile seizures plus, type 2|Generalized epilepsy with febrile seizures plus, type 1	Dravet Syndrome	PMIDs:18413471,33851920,34226156,26096185	Pathogenic/Likely pathogenic(Last reviewed: Oct 12, 2021)	2	166904177	2	166047667
NM_001165963.4(SCN1A):c.4822G>T (p.Asp1608Tyr)	Early infantile epileptic encephalopathy with suppression bursts|Severe myoclonic epilepsy in infancy|Seizure|Delayed speech and language development	severe myoclonic epilepsy	PMID:Â¬â€ 17561957	Pathogenic/Likely pathogenic(Last reviewed: Aug 15, 2018)	2	166850686	2	165994176
NM_001165963.4(SCN1A):c.4633A>G (p.Ile1545Val)	Severe myoclonic epilepsy in infancy|Early infantile epileptic encephalopathy with suppression bursts|Generalized epilepsy with febrile seizures plus, type 2|Severe myoclonic epilepsy in infancy|Familial hemiplegic migraine type 3	Severe myoclonic epilepsy in infancy,epilepsy	PMID:17347258,28202706,30619928	Pathogenic(Last reviewed: Feb 4, 2019)	2	166850875	2	165994365
NM_001165963.4(SCN1A):c.4300T>C (p.Trp1434Arg)	Severe myoclonic epilepsy in infancy|Generalized epilepsy with febrile seizures plus, type 2|not provided|Early infantile epileptic encephalopathy with suppression bursts	Dravet syndrome	PMID:12754708,18076640	Pathogenic(Last reviewed: Oct 15, 2021)	2	166856271	2	165999761
NM_001165963.4(SCN1A):c.2837G>A (p.Arg946His)	Early infantile epileptic encephalopathy with suppression bursts|Generalized epilepsy with febrile seizures plus, type 2|Severe myoclonic epilepsy in infancy|not provided|Seizure	Dravet Syndrome	PMID:21864321,27781031,23195492,21371021	Pathogenic(Last reviewed: Nov 10, 2020)	2	166894395	2	166037885
NM_001165963.4(SCN1A):c.2792G>A (p.Arg931His)	Severe myoclonic epilepsy in infancy|not provided|Early infantile epileptic encephalopathy with suppression bursts|Generalized epilepsy with febrile seizures plus, type 2|Severe myoclonic epilepsy in infancy|Familial hemiplegic migraine type 3	Dravet syndrome	PMID:22780858,27231140,28079314,25243660	Pathogenic(Last reviewed: Oct 31, 2018)	2	166894440	2	166037930
NM_001165963.4(SCN1A):c.4933C>T (p.Arg1645Ter)	Early infantile epileptic encephalopathy with suppression bursts|Severe myoclonic epilepsy in infancy|not provided|Generalized epilepsy with febrile seizures plus, type 2|Familial hemiplegic migraine type 3	Dravet syndrome and/or severe myoclonic epilepsy in infancy	PMID:14738421,19809937,29141279	Pathogenic(Last reviewed: Jan 5, 2022)	2	166848852	2	165992342
NM_001165963.4(SCN1A):c.4547C>A (p.Ser1516Ter)	Severe myoclonic epilepsy in infancy|Generalized epilepsy with febrile seizures plus, type 2|Familial hemiplegic migraine type 3|Severe myoclonic epilepsy in infancy|not provided|Early infantile epileptic encephalopathy with suppression bursts	Dravet syndrome	PMID:11940708,19589774,26544041	Pathogenic(Last reviewed: Oct 6, 2020)	2	166852557	2	165996047
NM_001165963.4(SCN1A):c.3985C>T (p.Arg1329Ter)	Severe myoclonic epilepsy in infancy|not provided|Generalized epilepsy with febrile seizures plus, type 2|Inborn genetic diseases|Early infantile epileptic encephalopathy with suppression bursts	Dravet syndrome	PMID:18930999,25754450	Pathogenic(Last reviewed: Jul 7, 2020)	2	166866246	2	166009736
NM_001165963.4(SCN1A):c.1702C>T (p.Arg568Ter)	Severe myoclonic epilepsy in infancy|Familial hemiplegic migraine type 3|Generalized epilepsy with febrile seizures plus, type 2|not provided|Early infantile epileptic encephalopathy with suppression bursts|Familial hemiplegic migraine type 3|Severe myoclonic epilepsy in infancy	Dravet syndrome	PMID:12083760,29852413	Pathogenic(Last reviewed: Jul 1, 2021)	2	166900520	2	166044010
NM_001165963.4(SCN1A):c.1624C>T (p.Arg542Ter)	Generalized epilepsy with febrile seizures plus, type 2|Severe myoclonic epilepsy in infancy|History of neurodevelopmental disorder|Early infantile epileptic encephalopathy with suppression bursts|not provided	severe myoclonic epilepsy of infancy (SMEI)	PMID:17054684	Pathogenic(Last reviewed: Sep 15, 2020)	2	166901591	2	166045081
NM_001165963.4(SCN1A):c.1028+2T>C	Familial hemiplegic migraine type 3|Early infantile epileptic encephalopathy with suppression bursts	Dravet syndrome	PMID:17347258	Pathogenic(Last reviewed: Jun 27, 2020)	2	166905394	2	166048884
NM_001165963.4(SCN1A):c.4476+1A>G	Early infantile epileptic encephalopathy with suppression bursts|Severe myoclonic epilepsy in infancy|not provided	Dravet syndrome or severe myoclonic epilepsy of infancy	PMID:21248271,23195492	Pathogenic/Likely pathogenic(Last reviewed: Aug 27, 2021)	2	166854547	2	165998037
NM_001165963.4(SCN1A):c.3706G>C (p.Ala1236Pro)	Severe myoclonic epilepsy in infancy|Intellectual disability	Dravet syndrome	PMID:26096185	Pathogenic/Likely pathogenic(Last reviewed: Aug 3, 2020)	2	166868792	2	166012282
